# Supplementary material for: Kinetic resolution of racemic 5-alkylcyclohexenones via Pd(ii)-catalyzed 1,4-additions of arylboronic acids – access to trans 3-alkyl-5-arylcyclohexanones
Source: Royal Society of Chemistry journal article supplement (doi:10.1039/c5qo00169b), 2015-01-01
Supplement: c5qo00169b1.pdf [file c5qo00169b1.pdf]

# Supporting Information

Kinetic Resolution of Racemic 5-Alkylcyclohexenones via Pd(II)-catalyzed  
1, 4-Additions of Arylboronic acids - Access to 3-alkyl-5-  
arylcyclohexanones

Kennard Gan, Abdul Sadeer, Jia Sheng Ng, Yunpeng Lu, Sumod Appukuttan Pullarkat

1.1

#### Calculation of Selectivity Factor (s)

The selectivity factor was calculated based on conversion and selectivities of the product alkanone according to the following equation:

$$s = \{ \ln [ 1 - C ( 1 + ee ) ] \} / \{ \ln [ 1 - C ( 1 - ee ) ] \}$$

#### Determination of *dr*

Based on the assignment by Kolb *et. al.* for compound **3a**, the retention times are as follows, *trans*-(3*R*, 5*R*), *trans*-(3*S*, 5*S*), *cis*-(3*S*, 5*R*) and *cis*-(3*R*, 5*S*).

Therefore,  $dr = [trans-(3R, 5R) + trans-(3S, 5S)] : [cis-(3S, 5R) + cis-(3R, 5S)]$

and,  $trans\ ee = [trans-(3R, 5R) - trans-(3S, 5S)] / [trans-(3R, 5R) + trans-(3S, 5S)]$

Consequent values of adducts are calculated based on the above.

1.2.1

3-methyl-5-phenyl cyclohexanone (**3a**):

$^1\text{H}$  NMR: **3a**

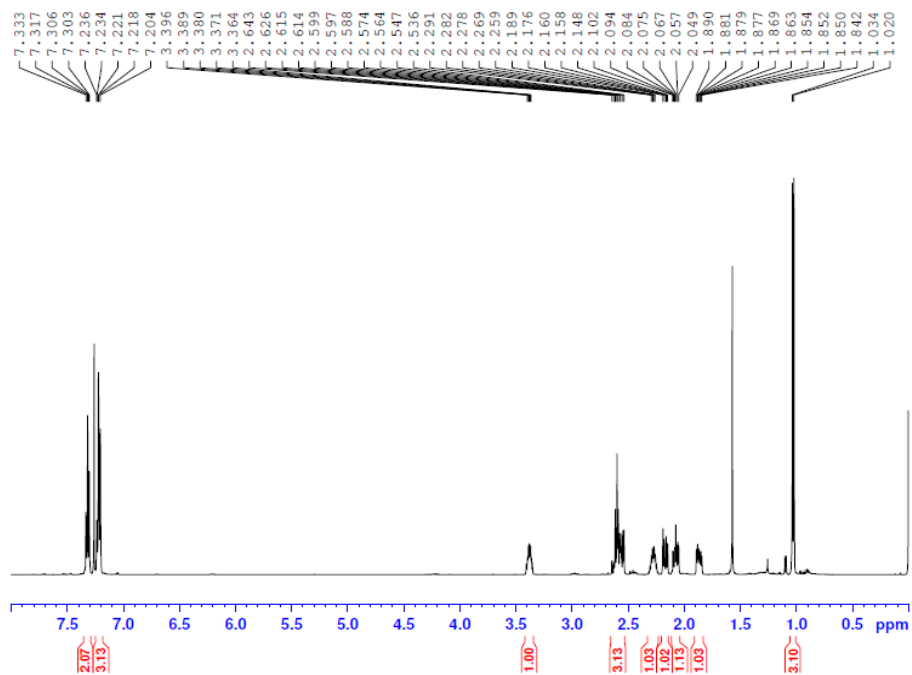

$^{13}\text{C}$  NMR: **3a**

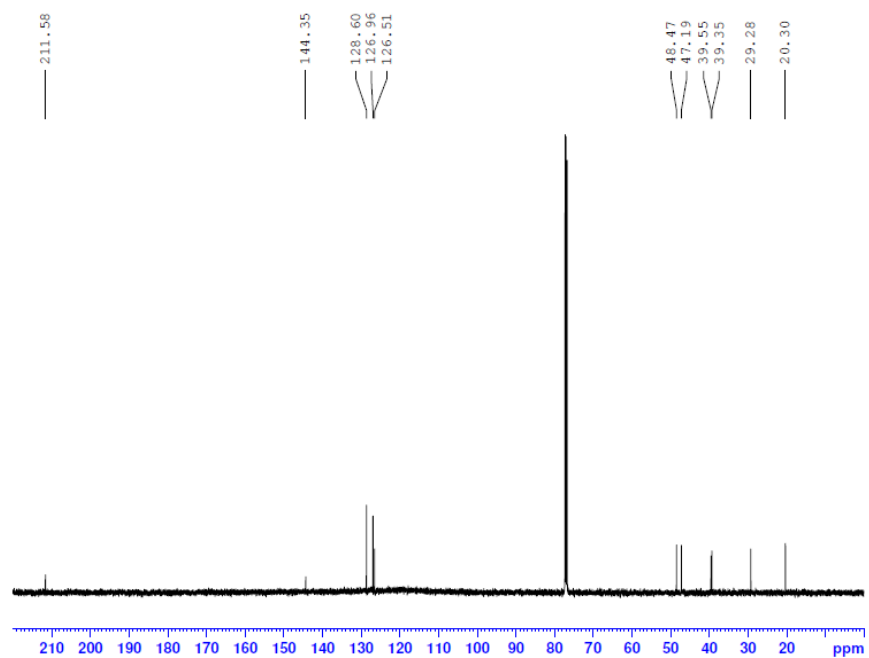

HPLC Data: 3a

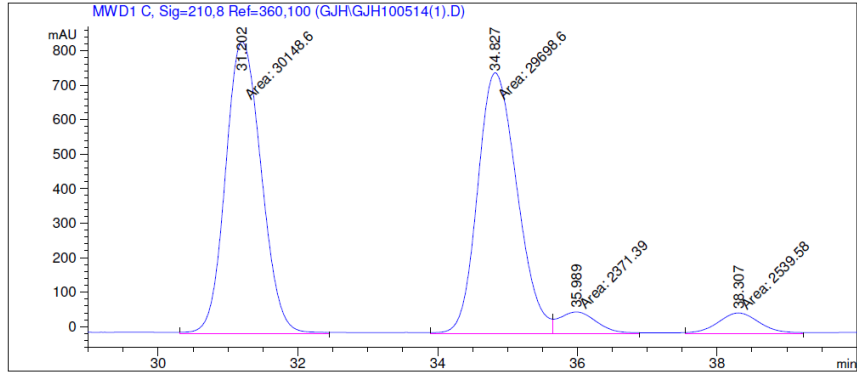

| Peak # | RetTime [min] | Type | Width [min] | Area [mAU*s] | Height [mAU] | Area %  |
|--------|---------------|------|-------------|--------------|--------------|---------|
| 1      | 31.202        | MM   | 0.5937      | 3.01486e4    | 846.37921    | 46.5557 |
| 2      | 34.827        | MF   | 0.6548      | 2.96986e4    | 755.95355    | 45.8608 |
| 3      | 35.989        | FM   | 0.6275      | 2371.38623   | 62.98321     | 3.6619  |
| 4      | 38.307        | MM   | 0.7059      | 2539.58252   | 59.95761     | 3.9216  |

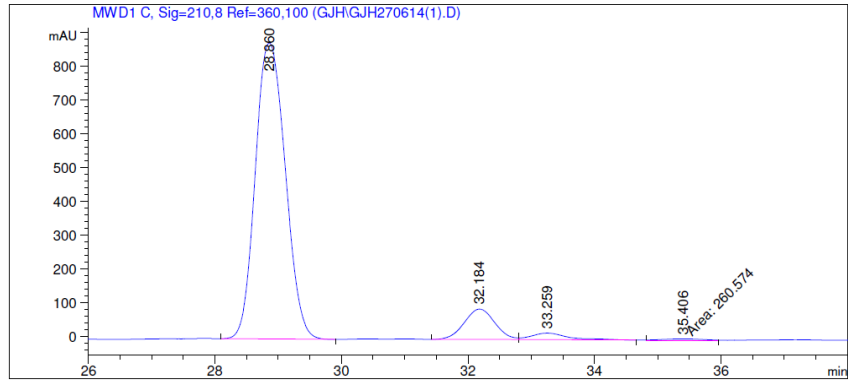

| Peak # | RetTime [min] | Type | Width [min] | Area [mAU*s] | Height [mAU] | Area %  |
|--------|---------------|------|-------------|--------------|--------------|---------|
| 1      | 28.860        | BB   | 0.5299      | 2.88330e4    | 876.25159    | 87.6686 |
| 2      | 32.184        | BV   | 0.5219      | 3010.72681   | 90.07731     | 9.1543  |
| 3      | 33.259        | VB   | 0.5818      | 784.31287    | 19.47725     | 2.3848  |
| 4      | 35.406        | MM   | 0.7888      | 260.57355    | 5.50589      | 0.7923  |

3-methyl-5-(*o*-tolyl)cyclohexanone (**3b**):

$^1\text{H}$  NMR: **3b**

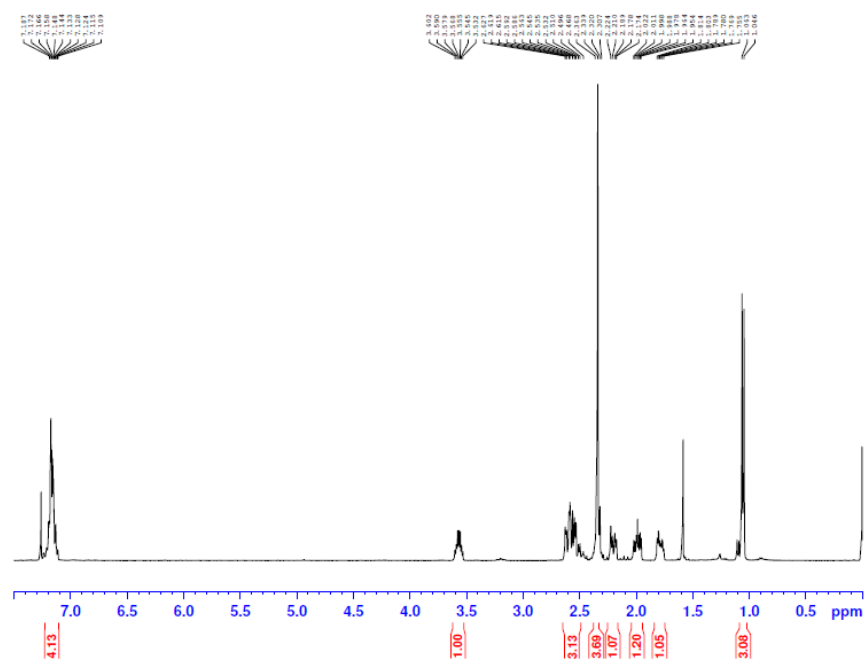

$^{13}\text{C}$  NMR: **3b**

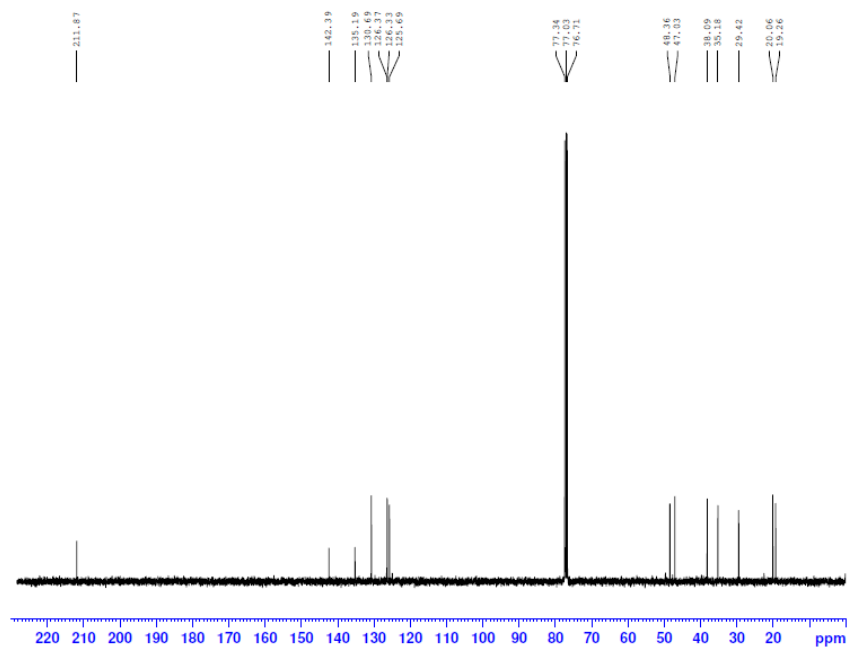

HPLC Data: 3b

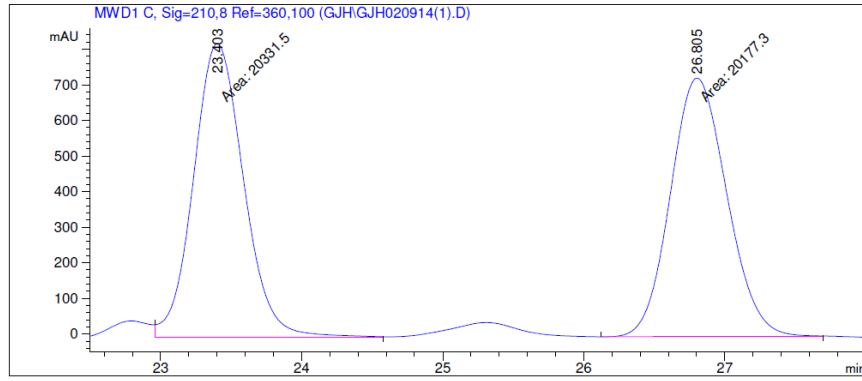

| Peak # | RetTime [min] | Type | Width [min] | Area [mAU*s] | Height [mAU] | Area %  |
|--------|---------------|------|-------------|--------------|--------------|---------|
| 1      | 23.403        | MM   | 0.4109      | 2.03315e4    | 824.76764    | 50.1903 |
| 2      | 26.805        | MM   | 0.4632      | 2.01773e4    | 726.01483    | 49.8097 |

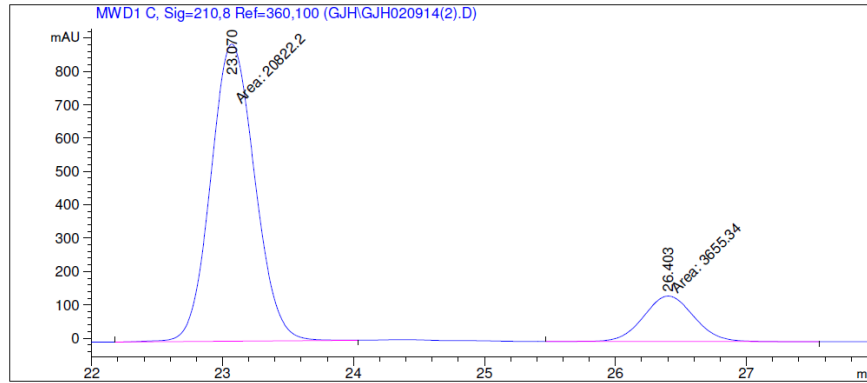

| Peak # | RetTime [min] | Type | Width [min] | Area [mAU*s] | Height [mAU] | Area %  |
|--------|---------------|------|-------------|--------------|--------------|---------|
| 1      | 23.070        | MM   | 0.3894      | 2.08222e4    | 891.17834    | 85.0665 |
| 2      | 26.403        | MM   | 0.4466      | 3655.34204   | 136.41870    | 14.9335 |

3-methyl-5-(*m*-tolyl)cyclohexanone (**3c**):

$^1\text{H}$  NMR: **3c**

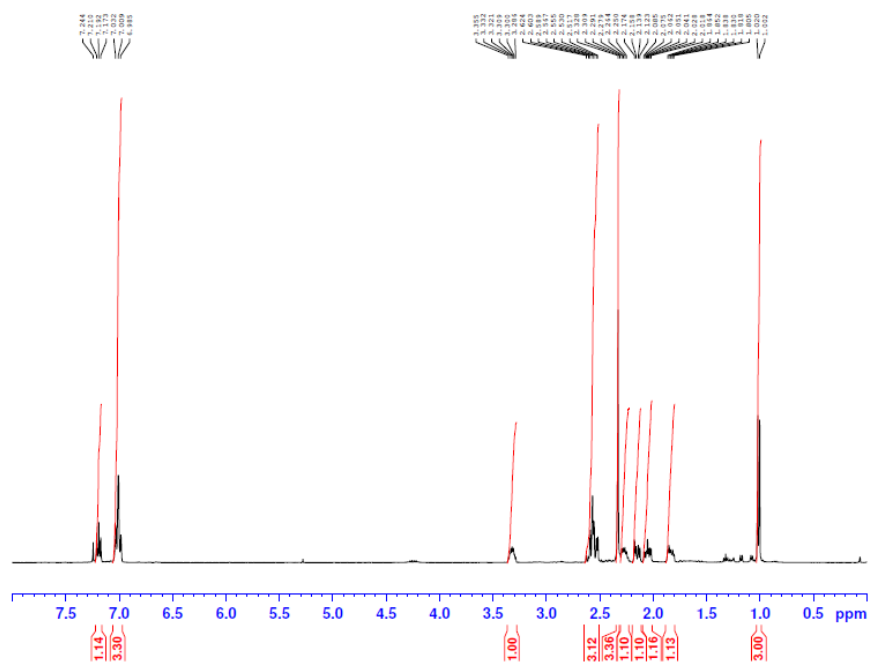

$^{13}\text{C}$  NMR: **3c**

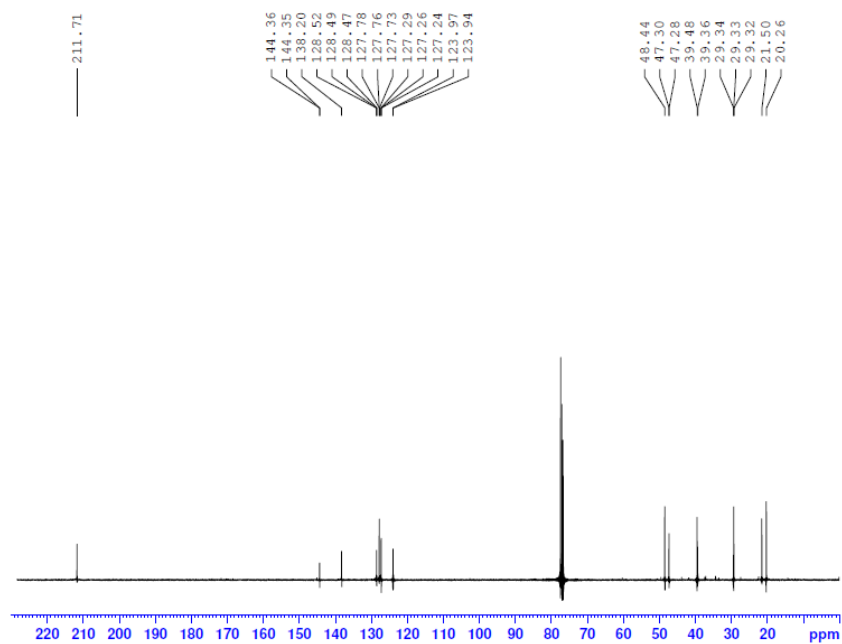

HPLC Data: 3c

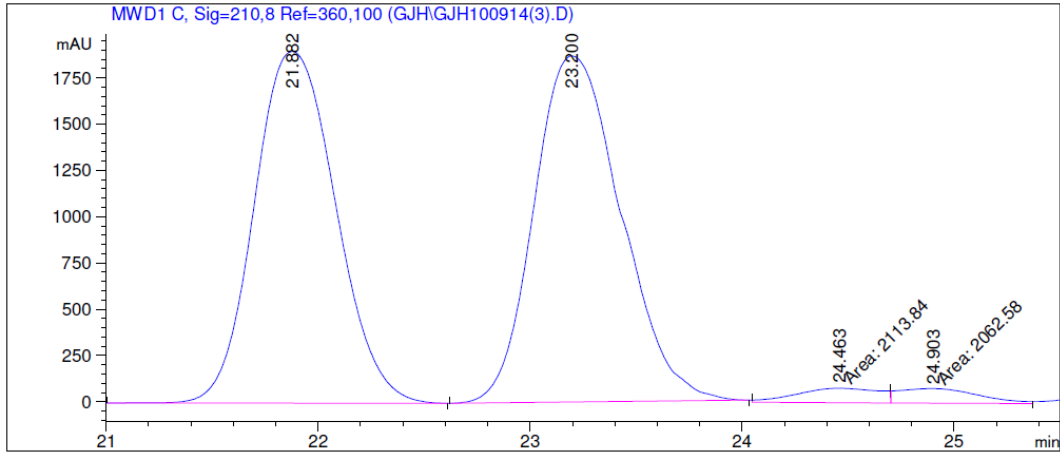

| Peak # | RetTime [min] | Type | Width [min] | Area [mAU*s] | Height [mAU] | Area %  |
|--------|---------------|------|-------------|--------------|--------------|---------|
| 1      | 21.882        | VB   | 0.4211      | 5.06967e4    | 1901.19153   | 46.8774 |
| 2      | 23.200        | BB   | 0.4402      | 5.32743e4    | 1870.77722   | 49.2608 |
| 3      | 24.463        | MF   | 0.4528      | 2113.83618   | 77.81053     | 1.9546  |
| 4      | 24.903        | FM   | 0.4358      | 2062.57813   | 78.87357     | 1.9072  |

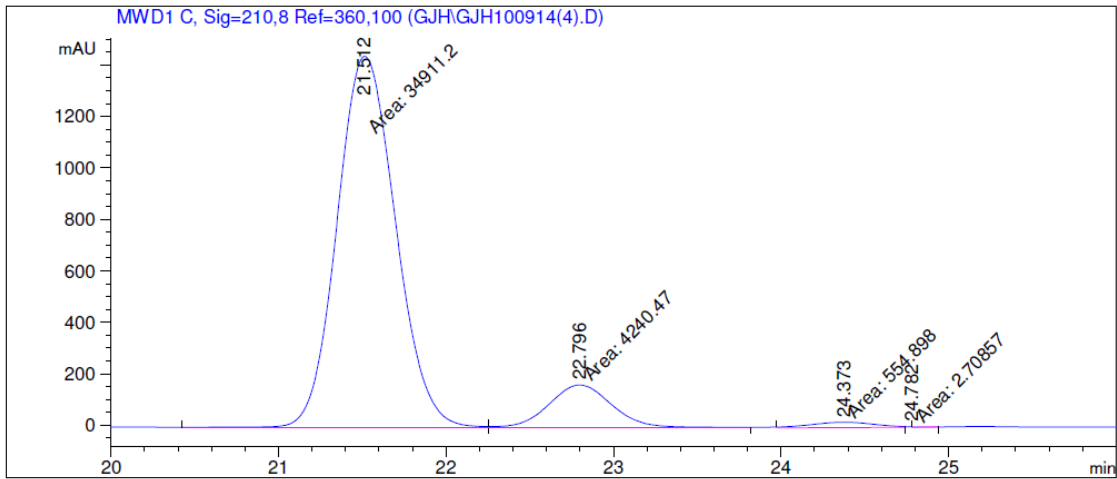

| Peak # | RetTime [min] | Type | Width [min] | Area [mAU*s] | Height [mAU] | Area %   |
|--------|---------------|------|-------------|--------------|--------------|----------|
| 1      | 21.512        | MF   | 0.4038      | 3.49112e4    | 1441.03577   | 87.9170  |
| 2      | 22.796        | FM   | 0.4298      | 4240.47363   | 164.44882    | 10.6788  |
| 3      | 24.373        | MM   | 0.4392      | 554.89795    | 21.05546     | 1.3974   |
| 4      | 24.782        | MM   | 0.0286      | 2.70857      | 1.57646      | 6.821e-3 |



3-methyl-5-(*p*-tolyl)cyclohexanone (**3d**):

$^1\text{H}$  NMR: **3d**

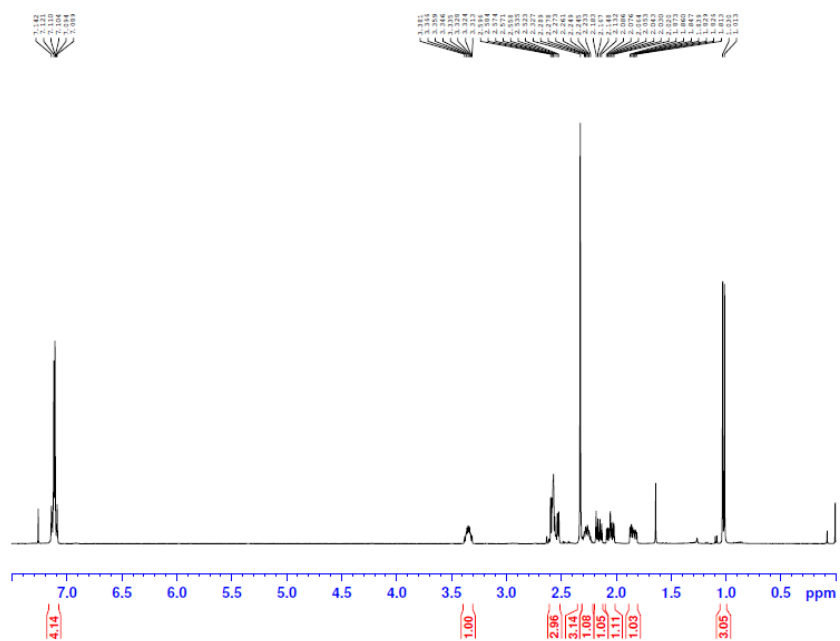

$^{13}\text{C}$  NMR: **3d**

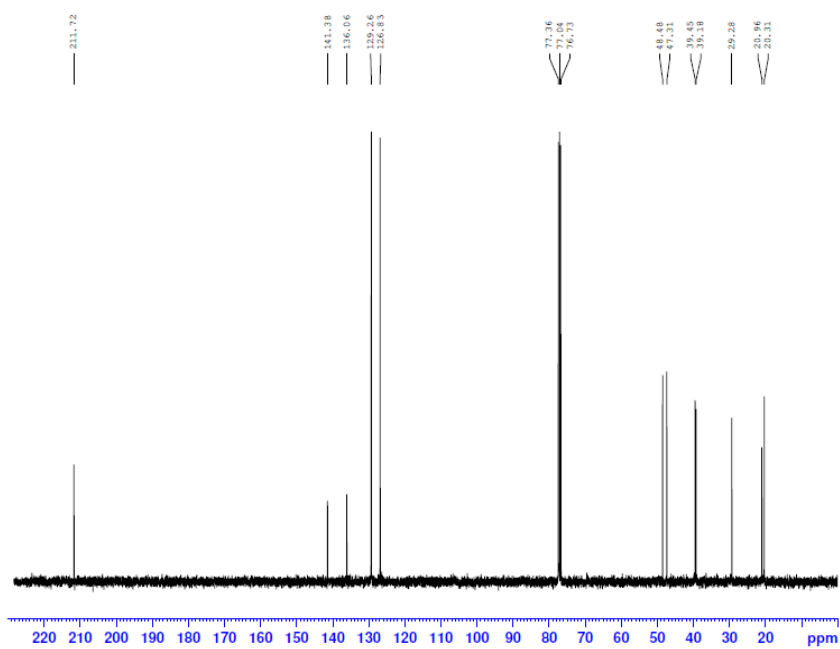

HPLC Data: 3d

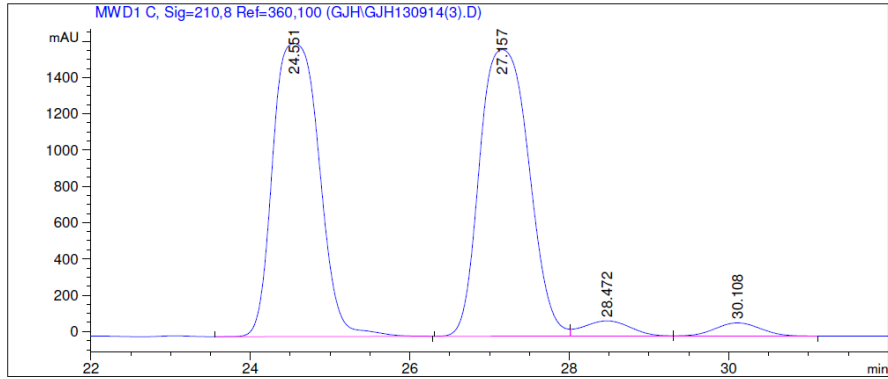

| Peak # | RetTime [min] | Type | Width [min] | Area [mAU*s] | Height [mAU] | Area %  |
|--------|---------------|------|-------------|--------------|--------------|---------|
| 1      | 24.551        | BB   | 0.6453      | 6.49943e4    | 1615.75574   | 46.7782 |
| 2      | 27.157        | BV   | 0.6934      | 6.76299e4    | 1579.80139   | 48.6752 |
| 3      | 28.472        | VV   | 0.6135      | 3426.80249   | 84.43647     | 2.4664  |
| 4      | 30.108        | VB   | 0.6055      | 2890.34546   | 72.74877     | 2.0803  |

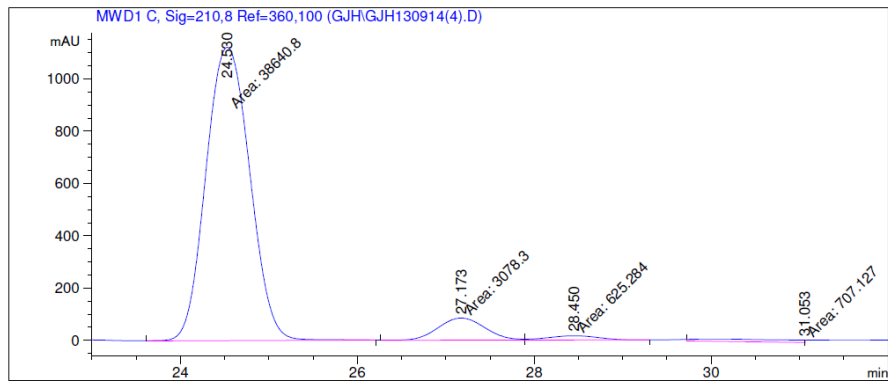

| Peak # | RetTime [min] | Type | Width [min] | Area [mAU*s] | Height [mAU] | Area %  |
|--------|---------------|------|-------------|--------------|--------------|---------|
| 1      | 24.530        | MM   | 0.5742      | 3.86408e4    | 1121.49304   | 89.7548 |
| 2      | 27.173        | MF   | 0.6095      | 3078.29517   | 84.17308     | 7.1503  |
| 3      | 28.450        | FM   | 0.6432      | 625.28406    | 16.20205     | 1.4524  |
| 4      | 31.053        | MM   | 1.2235      | 707.12683    | 9.63274      | 1.6425  |

3-methyl-5-(1-naphthalene)cyclohexanone (**3e**):

$^1\text{H}$  NMR: **3e**

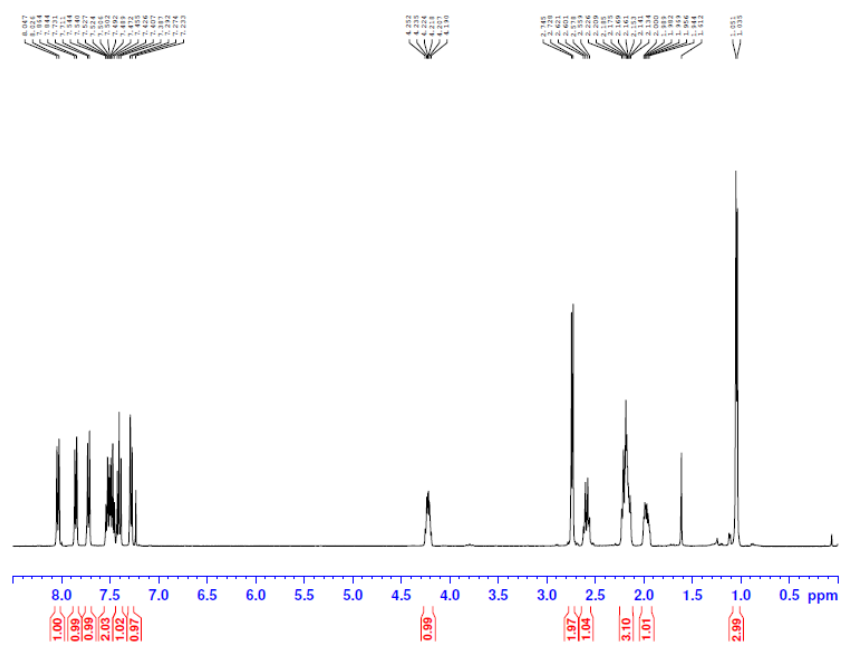

$^{13}\text{C}$ : **3e**

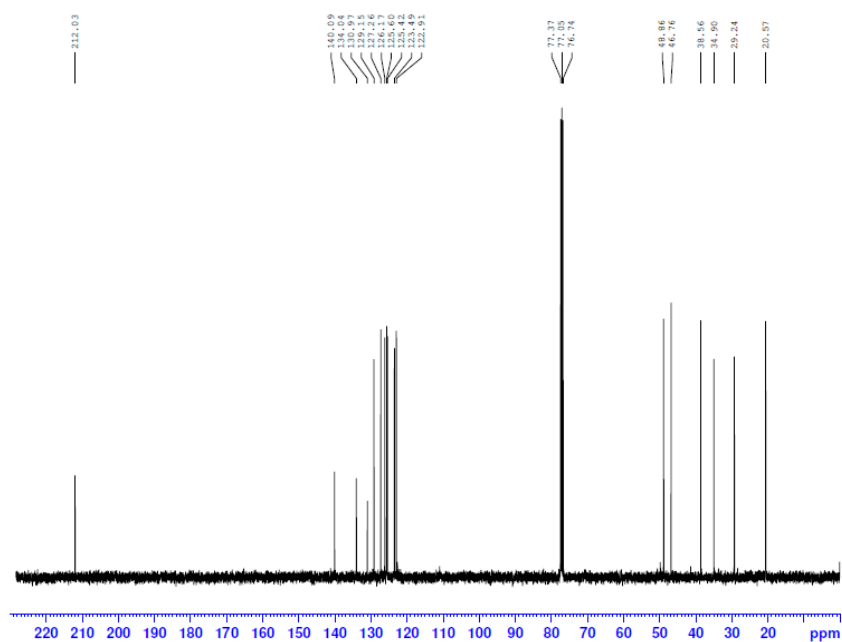

HPLC Data: 3e

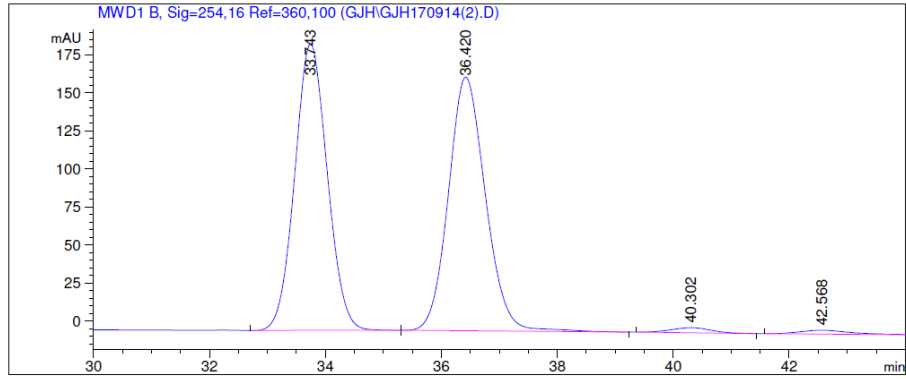

| Peak # | RetTime [min] | Type | Width [min] | Area [mAU*s] | Height [mAU] | Area %  |
|--------|---------------|------|-------------|--------------|--------------|---------|
| 1      | 33.743        | BB   | 0.6068      | 7342.55566   | 188.34312    | 48.6787 |
| 2      | 36.420        | BB   | 0.6780      | 7407.92139   | 166.84525    | 49.1120 |
| 3      | 40.302        | BB   | 0.6134      | 158.55989    | 3.39169      | 1.0512  |
| 4      | 42.568        | BBA  | 0.8152      | 174.68863    | 2.58892      | 1.1581  |

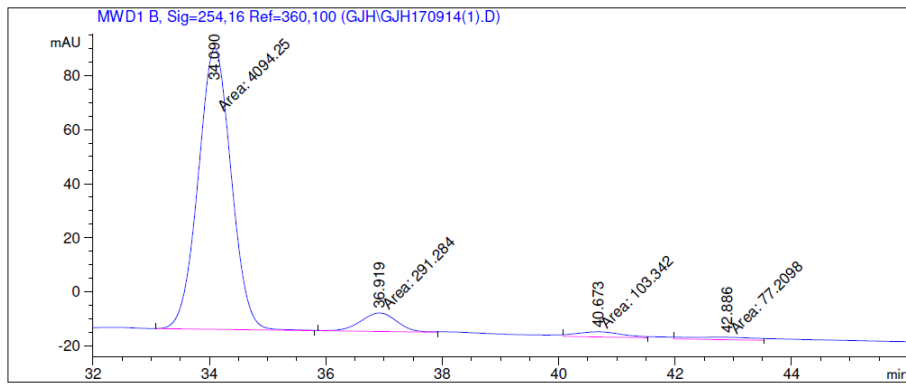

| Peak # | RetTime [min] | Type | Width [min] | Area [mAU*s] | Height [mAU] | Area %  |
|--------|---------------|------|-------------|--------------|--------------|---------|
| 1      | 34.090        | MM   | 0.6554      | 4094.25439   | 104.11782    | 89.6665 |
| 2      | 36.919        | MM   | 0.7085      | 291.28369    | 6.85227      | 6.3793  |
| 3      | 40.673        | MM   | 0.9171      | 103.34182    | 1.87808      | 2.2632  |
| 4      | 42.886        | MM   | 1.3274      | 77.20979     | 9.69408e-1   | 1.6909  |

3-methyl-5-(2-naphthalene)cyclohexanone (**3f**):

$^1\text{H}$  NMR: **3f**

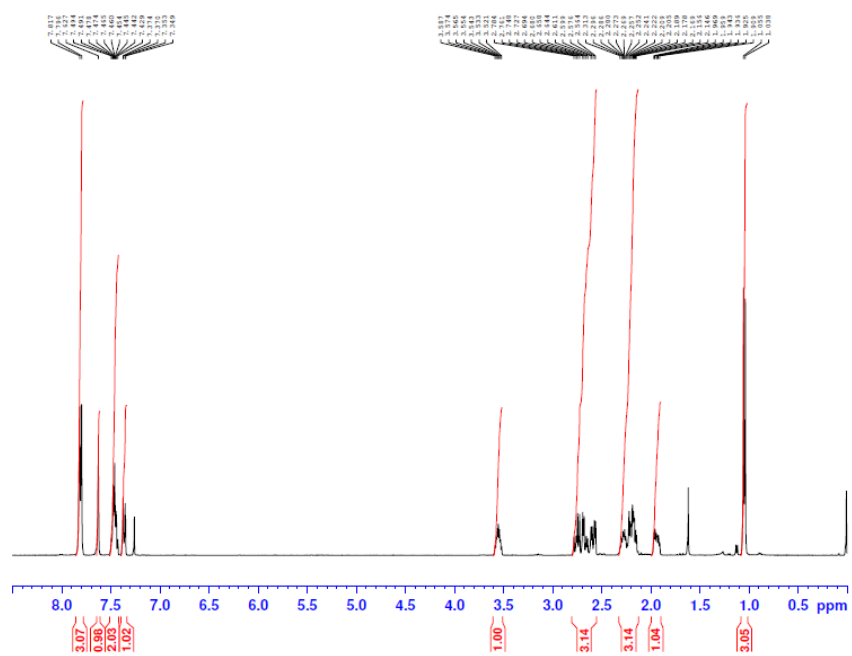

$^{13}\text{C}$  NMR: **3f**

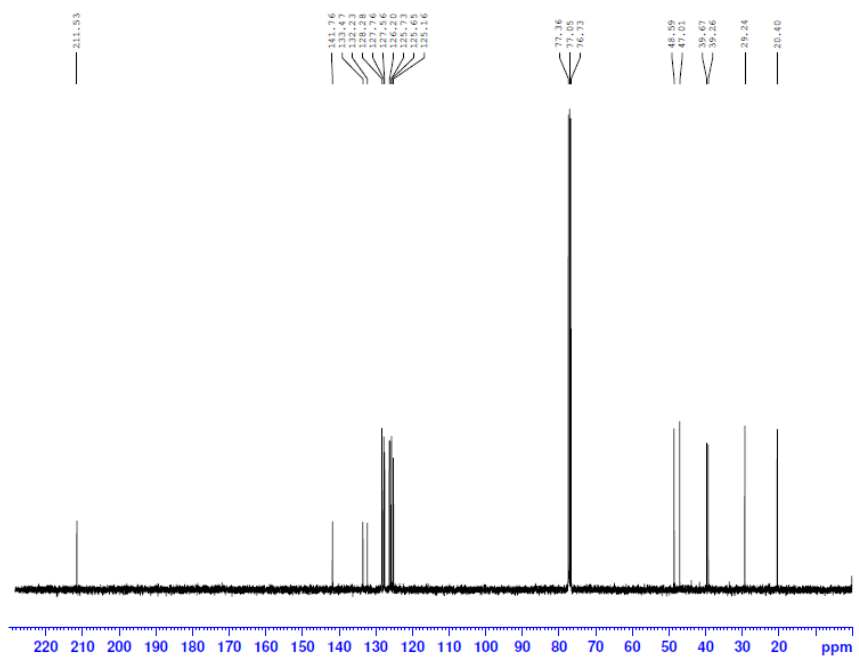

HPLC Data: 3f

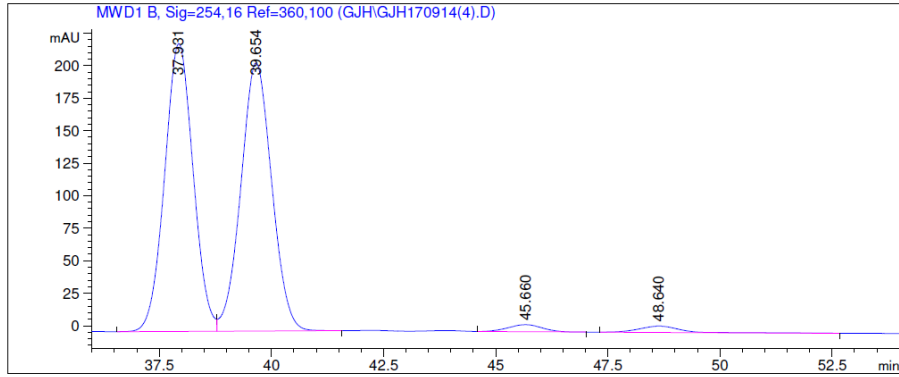

| Peak # | RetTime [min] | Type | Width [min] | Area [mAU*s] | Height [mAU] | Area %  |
|--------|---------------|------|-------------|--------------|--------------|---------|
| 1      | 37.931        | BV   | 0.6889      | 9805.44238   | 221.30238    | 48.3836 |
| 2      | 39.654        | VB   | 0.7425      | 9874.68164   | 206.28798    | 48.7253 |
| 3      | 45.660        | BB   | 0.7754      | 285.72226    | 5.36426      | 1.4099  |
| 4      | 48.640        | BB   | 0.8049      | 300.18845    | 4.85795      | 1.4812  |

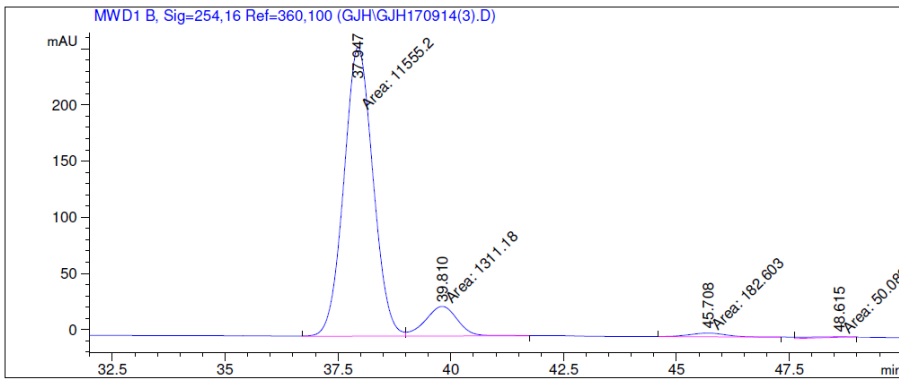

| Peak # | RetTime [min] | Type | Width [min] | Area [mAU*s] | Height [mAU] | Area %  |
|--------|---------------|------|-------------|--------------|--------------|---------|
| 1      | 37.947        | MF   | 0.7488      | 1.15552e4    | 257.20090    | 88.2140 |
| 2      | 39.810        | FM   | 0.8283      | 1311.18030   | 26.38168     | 10.0097 |
| 3      | 45.708        | MM   | 0.9201      | 182.60315    | 3.30750      | 1.3940  |
| 4      | 48.615        | MM   | 1.3842      | 50.08234     | 4.25500e-1   | 0.3823  |

3-methyl-5-(Biphenyl-4)cyclohexanone (**3g**):

$^1\text{H}$  NMR: **3g**

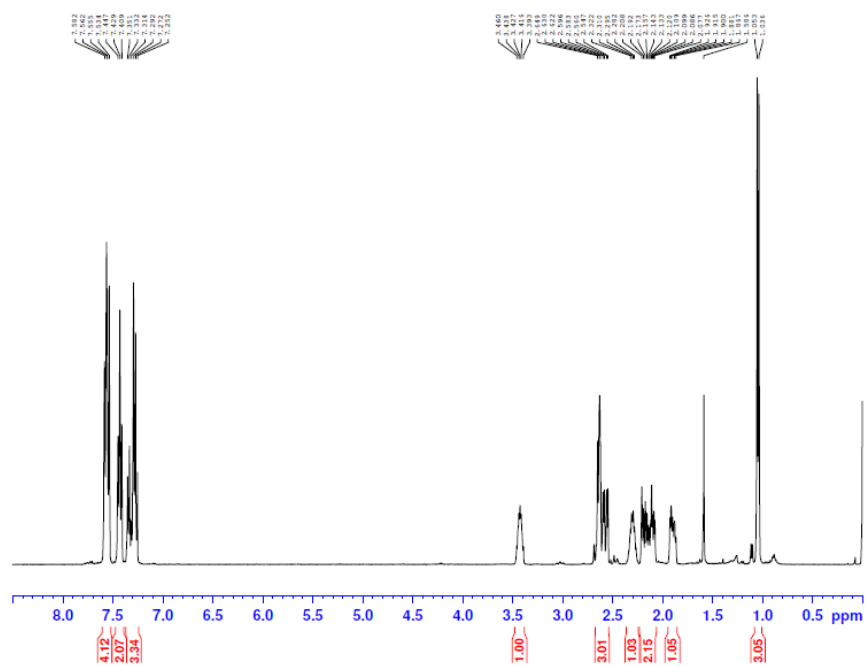

$^{13}\text{C}$  NMR: **3g**

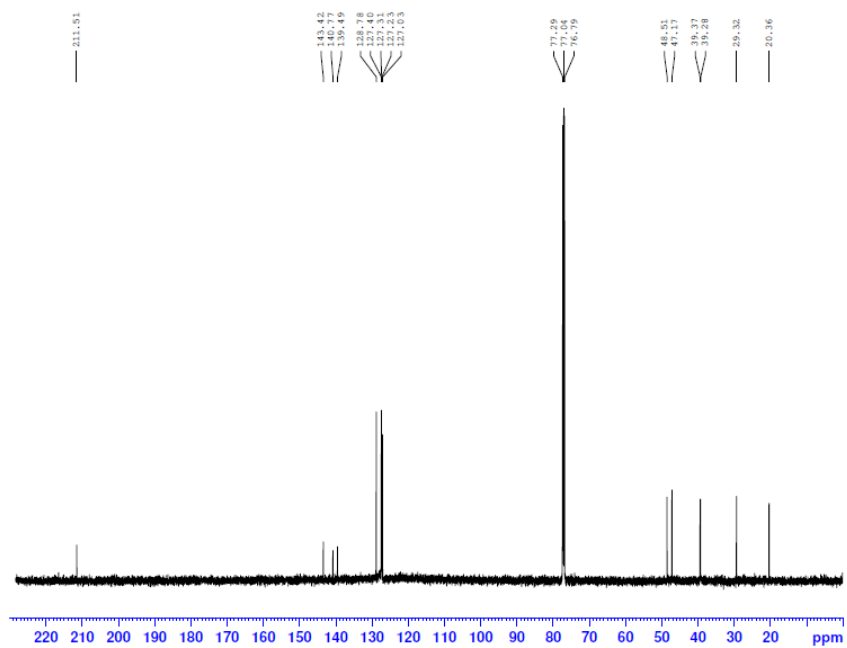

HPLC Data: 3g

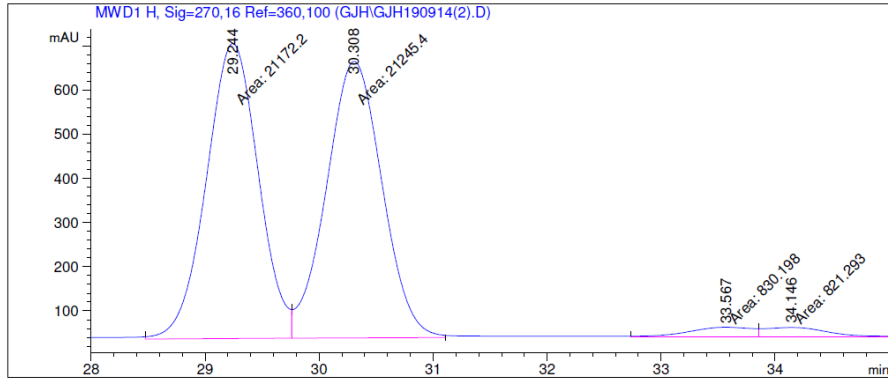

| Peak # | RetTime [min] | Type | Width [min] | Area [mAU*s] | Height [mAU] | Area %  |
|--------|---------------|------|-------------|--------------|--------------|---------|
| 1      | 29.244        | MF   | 0.5283      | 2.11722e4    | 667.87811    | 48.0433 |
| 2      | 30.308        | FM   | 0.5658      | 2.12454e4    | 625.83911    | 48.2092 |
| 3      | 33.567        | MF   | 0.6413      | 830.19849    | 21.57507     | 1.8839  |
| 4      | 34.146        | FM   | 0.6520      | 821.29260    | 20.99288     | 1.8636  |

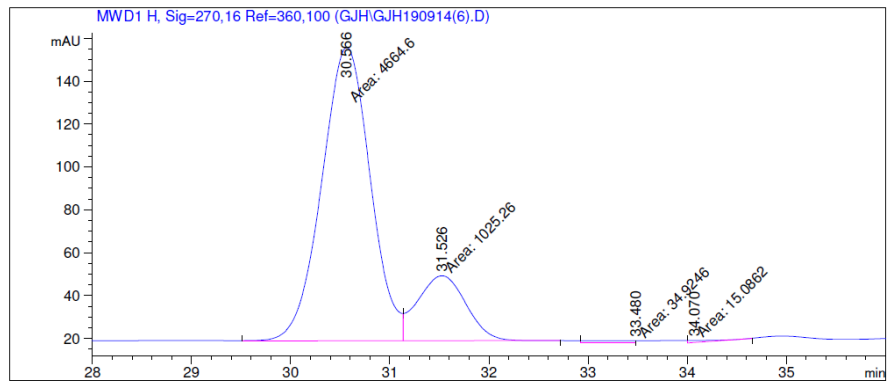

| Peak # | RetTime [min] | Type | Width [min] | Area [mAU*s] | Height [mAU] | Area %  |
|--------|---------------|------|-------------|--------------|--------------|---------|
| 1      | 30.566        | MF   | 0.5681      | 4664.60107   | 136.85965    | 81.2666 |
| 2      | 31.526        | FM   | 0.5639      | 1025.26111   | 30.30319     | 17.8621 |
| 3      | 33.480        | MM   | 0.5431      | 34.92465     | 1.07172      | 0.6085  |
| 4      | 34.070        | MM   | 0.2604      | 15.08622     | 9.65540e-1   | 0.2628  |



3-methyl-5- *p*-methoxyphenylcyclohexanone (**3h**):

<sup>1</sup>H NMR: **3h**

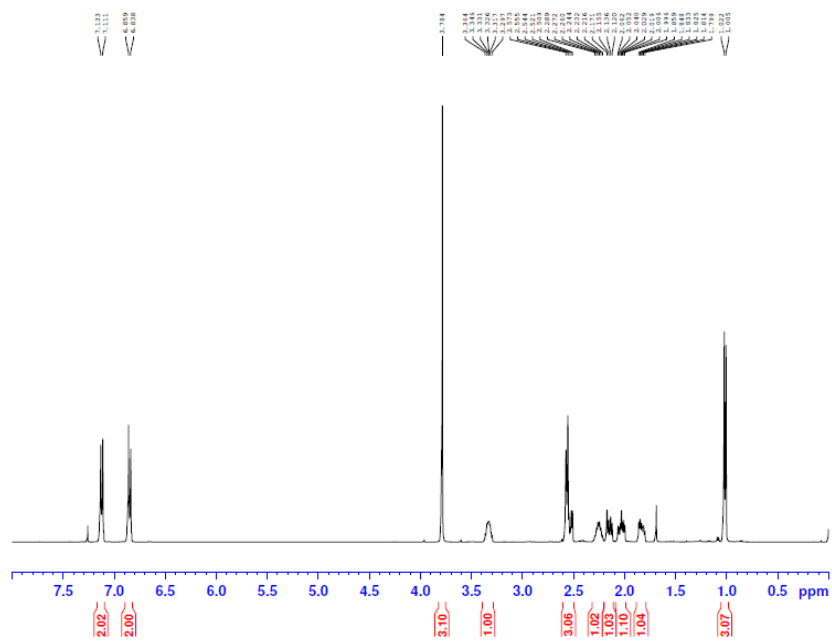

<sup>13</sup>C NMR: **3h**

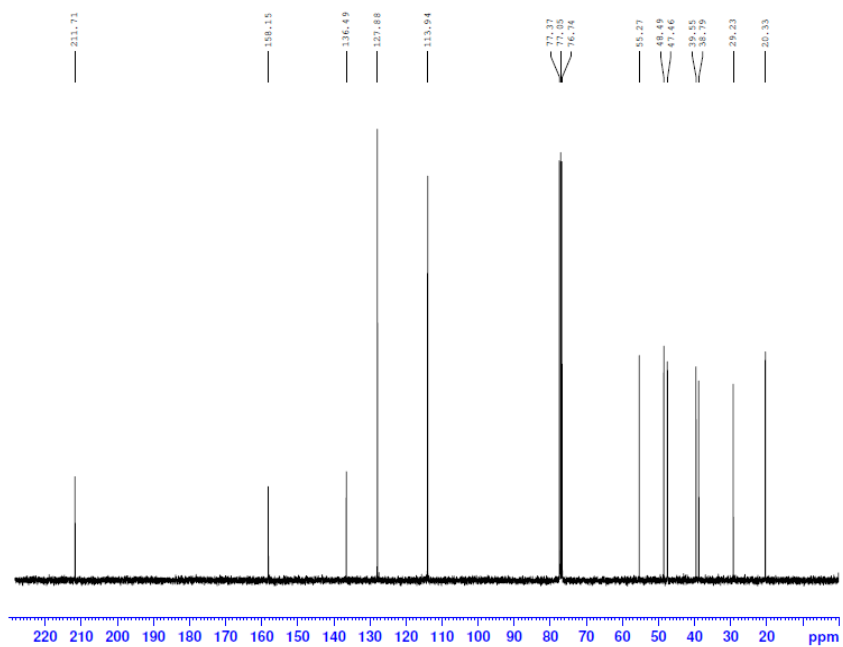

HPLC Data: 3h

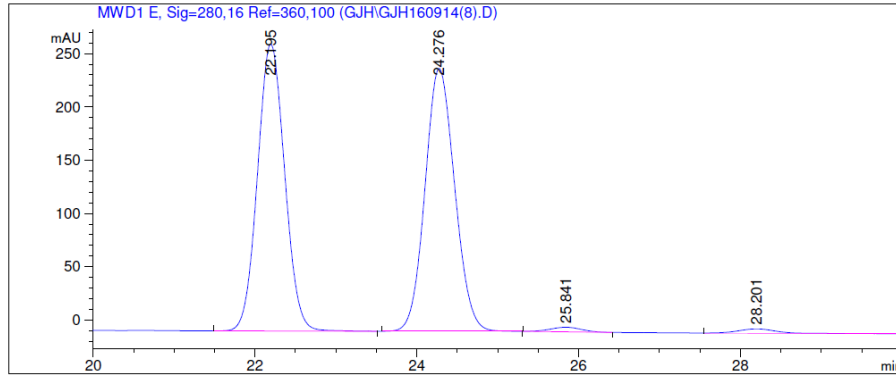

| Peak # | RetTime [min] | Type | Width [min] | Area [mAU*s] | Height [mAU] | Area %  |
|--------|---------------|------|-------------|--------------|--------------|---------|
| 1      | 22.195        | BB   | 0.3660      | 6282.16357   | 269.49600    | 49.0336 |
| 2      | 24.276        | BB   | 0.3950      | 6282.26611   | 246.80898    | 49.0344 |
| 3      | 25.841        | BB   | 0.4097      | 115.26737    | 4.37028      | 0.8997  |
| 4      | 28.201        | BB   | 0.4714      | 132.26280    | 4.15446      | 1.0323  |

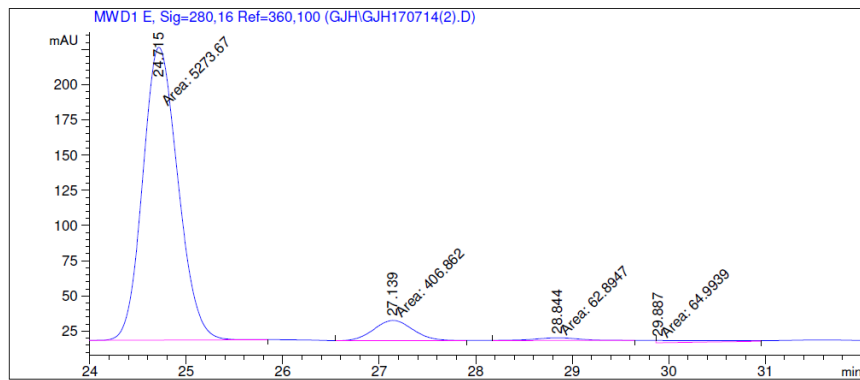

| Peak # | RetTime [min] | Type | Width [min] | Area [mAU*s] | Height [mAU] | Area %  |
|--------|---------------|------|-------------|--------------|--------------|---------|
| 1      | 24.715        | MM   | 0.4227      | 5273.67432   | 207.92404    | 90.7935 |
| 2      | 27.139        | MM   | 0.4723      | 406.86227    | 14.35801     | 7.0047  |
| 3      | 28.844        | MM   | 0.5412      | 62.89470     | 1.93700      | 1.0828  |
| 4      | 29.887        | MM   | 0.6518      | 64.99390     | 1.66183      | 1.1190  |

3-methyl-5- *p*-fluorophenylcyclohexanone (**3i**):

<sup>1</sup>H NMR: **3i**

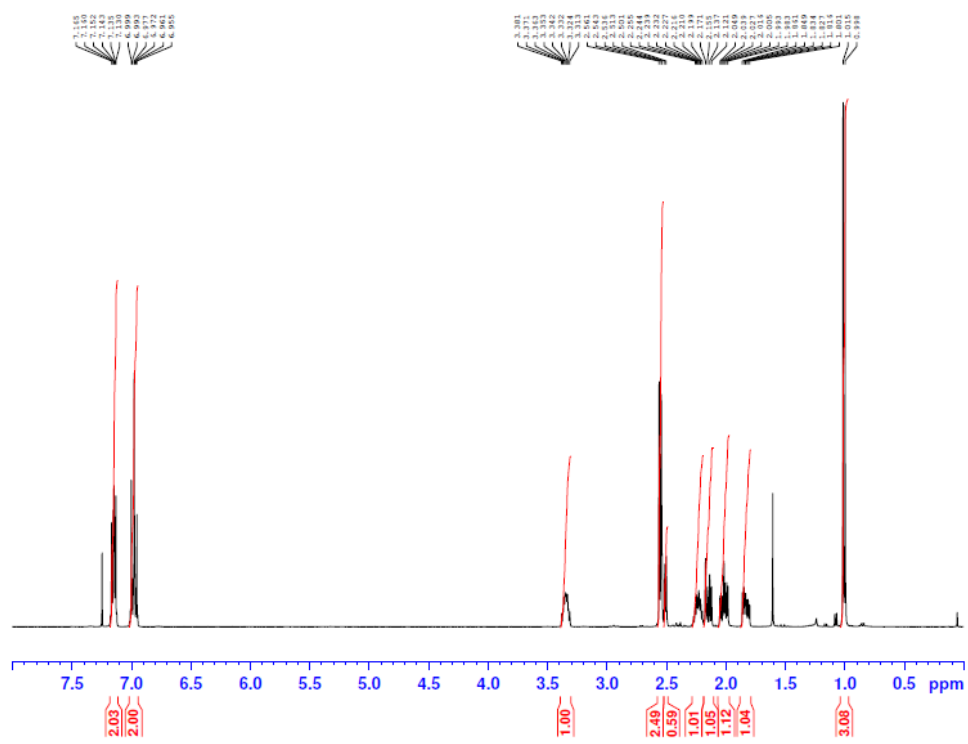

<sup>13</sup>C NMR: **3i**

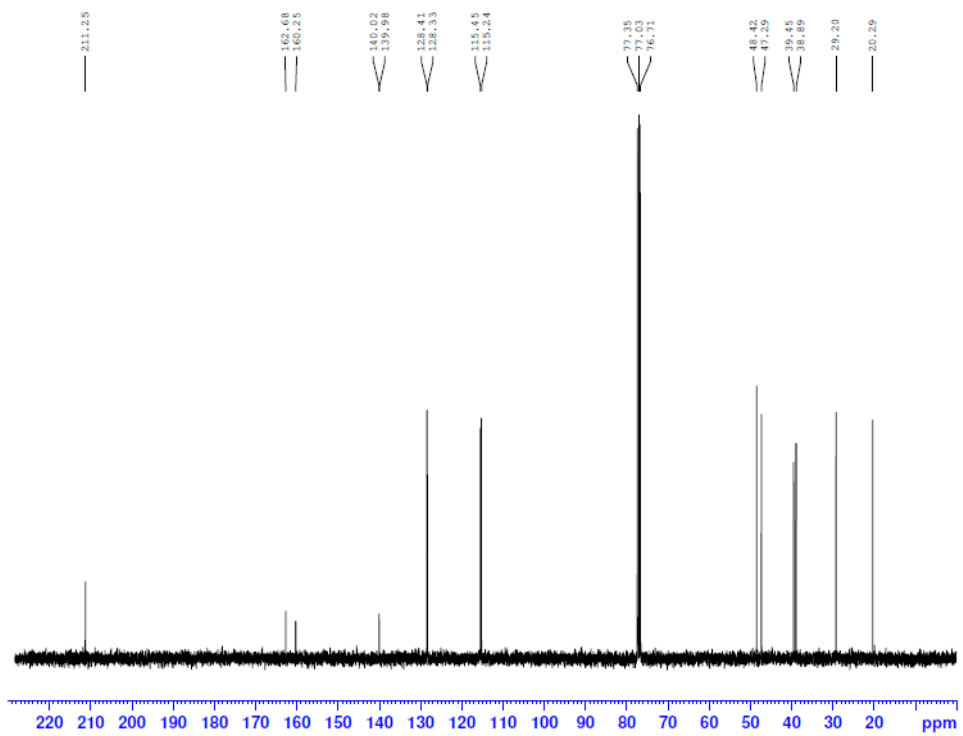

<sup>19</sup>F NMR: **3i**

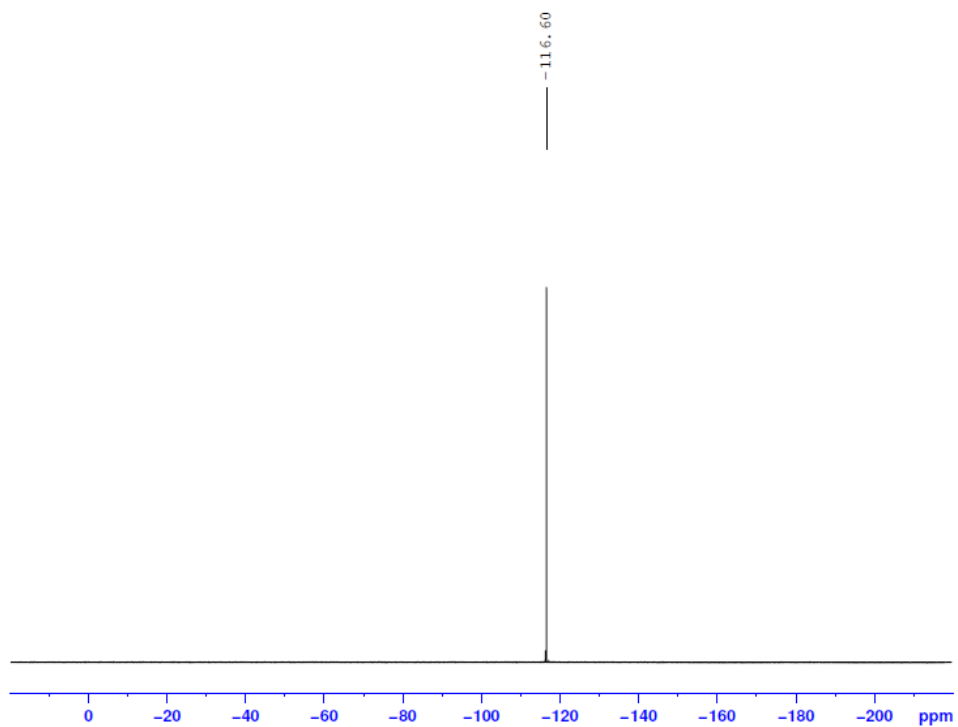

HPLC Data: 3i

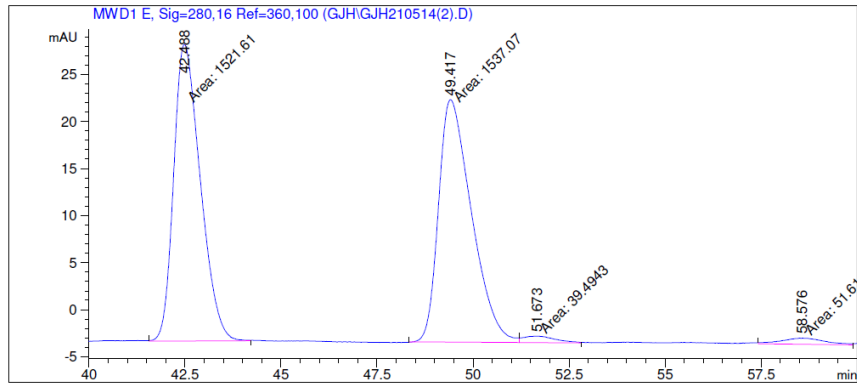

| Peak # | RetTime [min] | Type | Width [min] | Area [mAU*s] | Height [mAU] | Area %  |
|--------|---------------|------|-------------|--------------|--------------|---------|
| 1      | 42.488        | MM   | 0.8045      | 1521.61487   | 31.52444     | 48.3084 |
| 2      | 49.417        | MF   | 0.9945      | 1537.06848   | 25.75908     | 48.7991 |
| 3      | 51.673        | FM   | 0.9530      | 39.49427     | 6.90713e-1   | 1.2539  |
| 4      | 58.576        | MM   | 1.3324      | 51.61390     | 6.45607e-1   | 1.6386  |

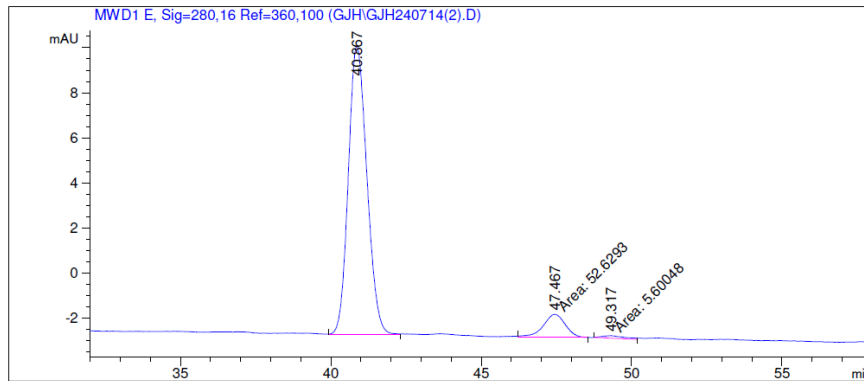

| Peak # | RetTime [min] | Type | Width [min] | Area [mAU*s] | Height [mAU] | Area %  |
|--------|---------------|------|-------------|--------------|--------------|---------|
| 1      | 40.867        | BB   | 0.6570      | 547.29919    | 12.79538     | 90.3837 |
| 2      | 47.467        | MM   | 0.8604      | 52.62928     | 1.01942      | 8.6915  |
| 3      | 49.317        | MM   | 0.8438      | 5.60048      | 1.10616e-1   | 0.9249  |

3-methyl-5- *p*-hydroxyphenylcyclohexanone (**3j**):

<sup>1</sup>H NMR: **3j**

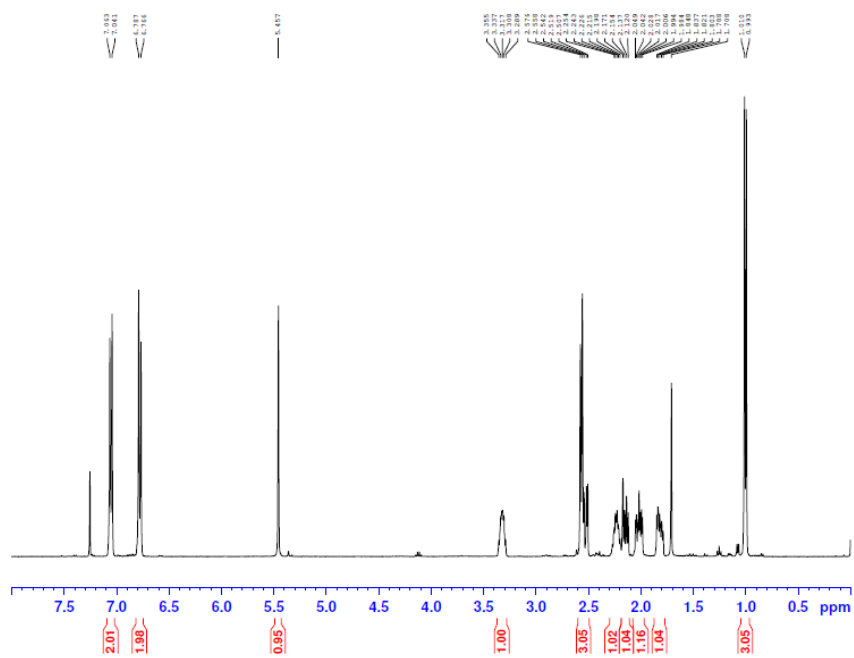

<sup>13</sup>C NMR: **3j**

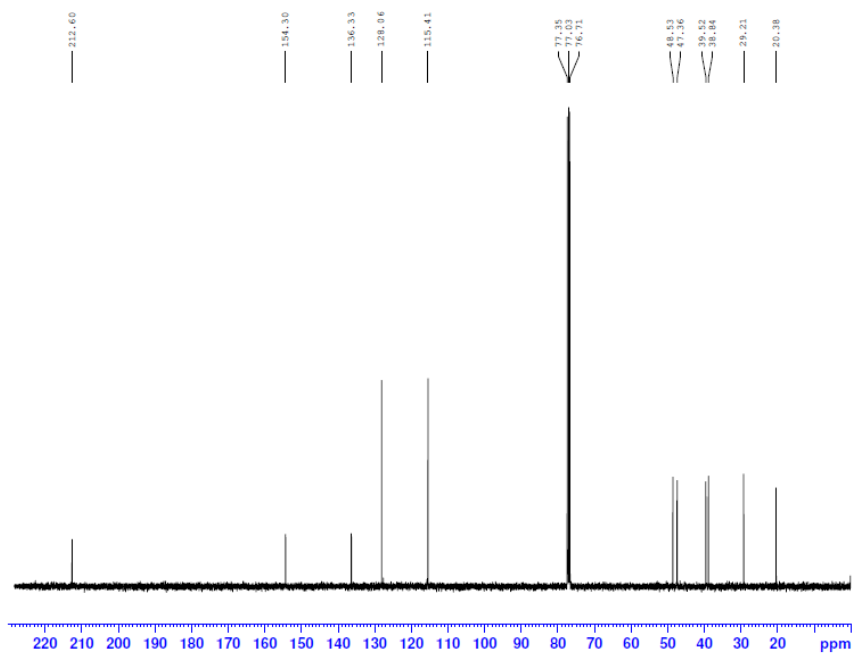

HPLC Data: 3j

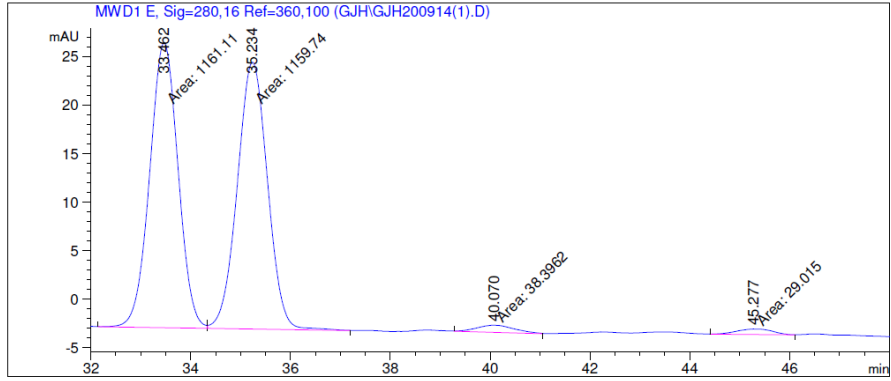

| Peak # | RetTime [min] | Type | Width [min] | Area [mAU*s] | Height [mAU] | Area %  |
|--------|---------------|------|-------------|--------------|--------------|---------|
| 1      | 33.462        | MF   | 0.6583      | 1161.10889   | 29.39500     | 48.6174 |
| 2      | 35.234        | FM   | 0.7022      | 1159.73584   | 27.52764     | 48.5599 |
| 3      | 40.070        | MM   | 0.8662      | 38.39620     | 7.38780e-1   | 1.6077  |
| 4      | 45.277        | MM   | 0.8504      | 29.01501     | 5.68639e-1   | 1.2149  |

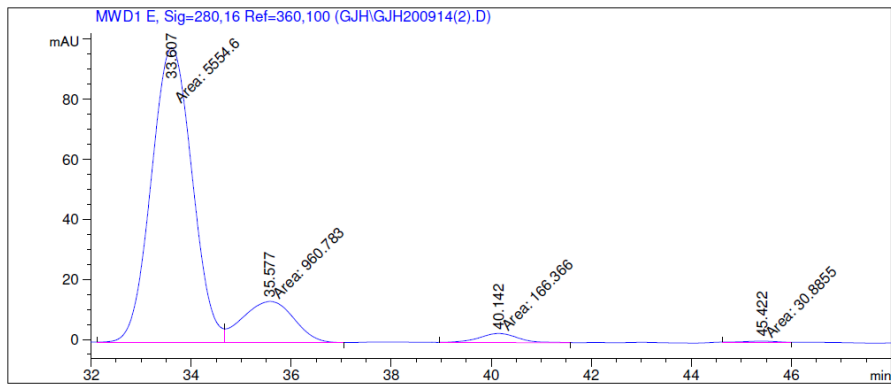

| Peak # | RetTime [min] | Type | Width [min] | Area [mAU*s] | Height [mAU] | Area %  |
|--------|---------------|------|-------------|--------------|--------------|---------|
| 1      | 33.607        | MF   | 0.9438      | 5554.59912   | 98.08818     | 82.7484 |
| 2      | 35.577        | FM   | 1.1790      | 960.78345    | 13.58222     | 14.3131 |
| 3      | 40.142        | MM   | 0.9129      | 166.36627    | 3.03731      | 2.4784  |
| 4      | 45.422        | MM   | 0.9344      | 30.88548     | 5.50909e-1   | 0.4601  |

3-methyl-4-phenylcyclohexanone (**3k**):

<sup>1</sup>H NMR: **3k**

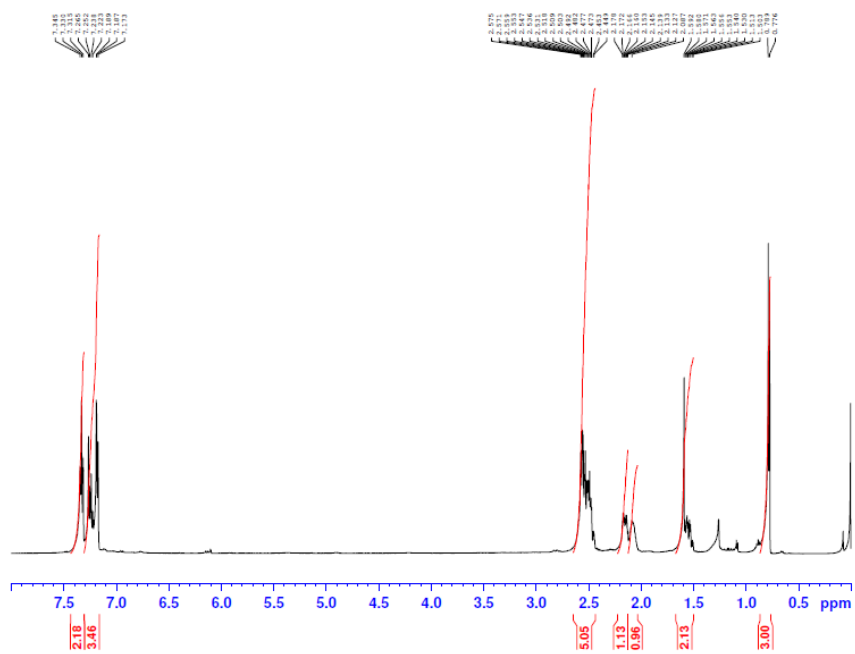

<sup>13</sup>C NMR: **3k**

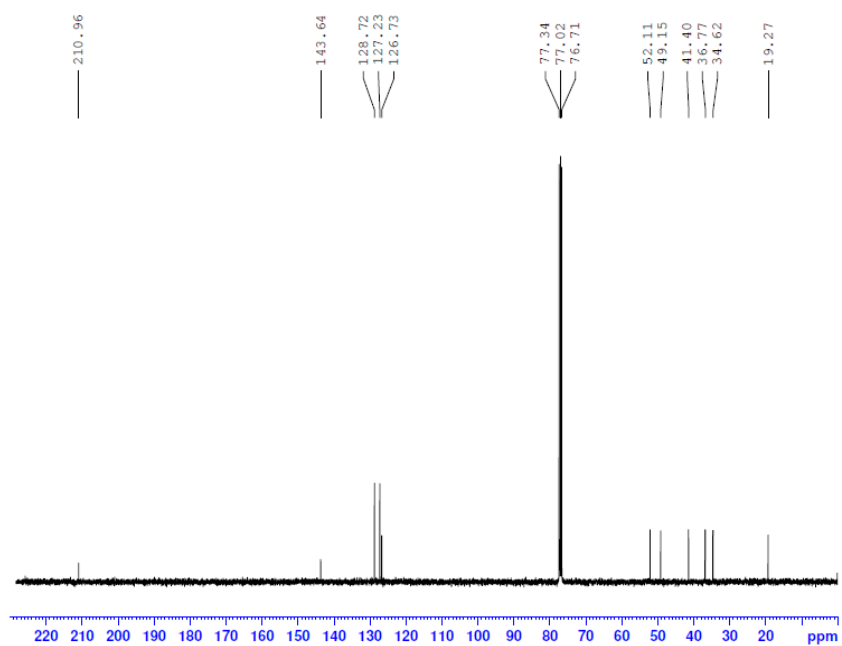



HPLC Data: 3k

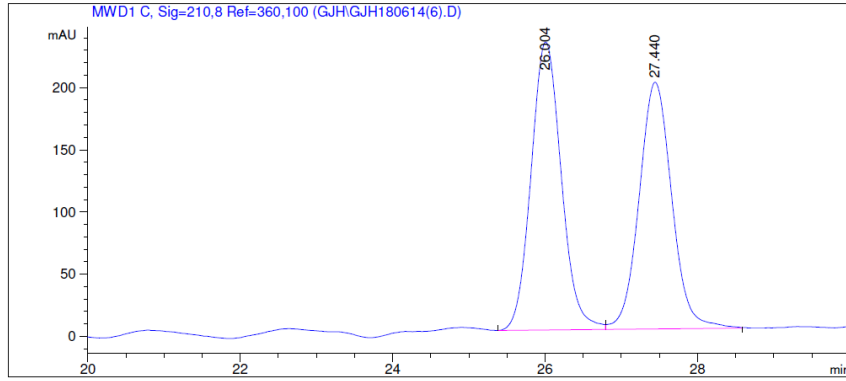

| Peak # | RetTime [min] | Type | Width [min] | Area [mAU*s] | Height [mAU] | Area %  |
|--------|---------------|------|-------------|--------------|--------------|---------|
| 1      | 26.004        | BV   | 0.4297      | 6387.42090   | 231.60951    | 47.3919 |
| 2      | 27.440        | VV   | 0.4624      | 5925.37012   | 198.40744    | 43.9637 |

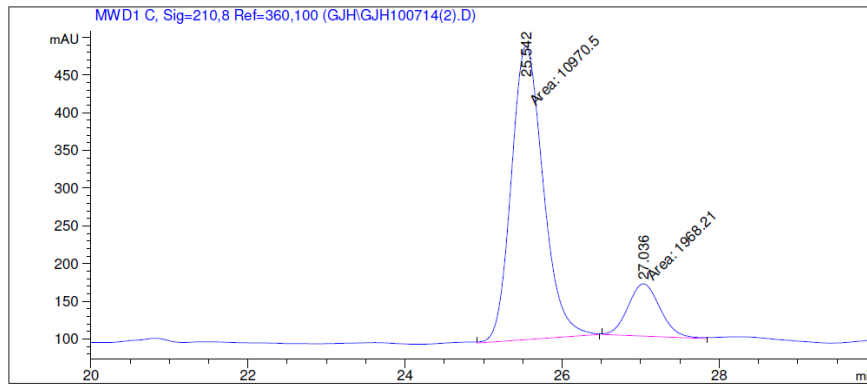

| Peak # | RetTime [min] | Type | Width [min] | Area [mAU*s] | Height [mAU] | Area %  |
|--------|---------------|------|-------------|--------------|--------------|---------|
| 1      | 25.542        | MM   | 0.4704      | 1.09705e4    | 388.68365    | 84.7882 |
| 2      | 27.036        | MM   | 0.4736      | 1968.21350   | 69.26700     | 15.2118 |

3-ethyl-5-phenylcyclohexanone (**3I**):

$^1\text{H}$  NMR: **3I**

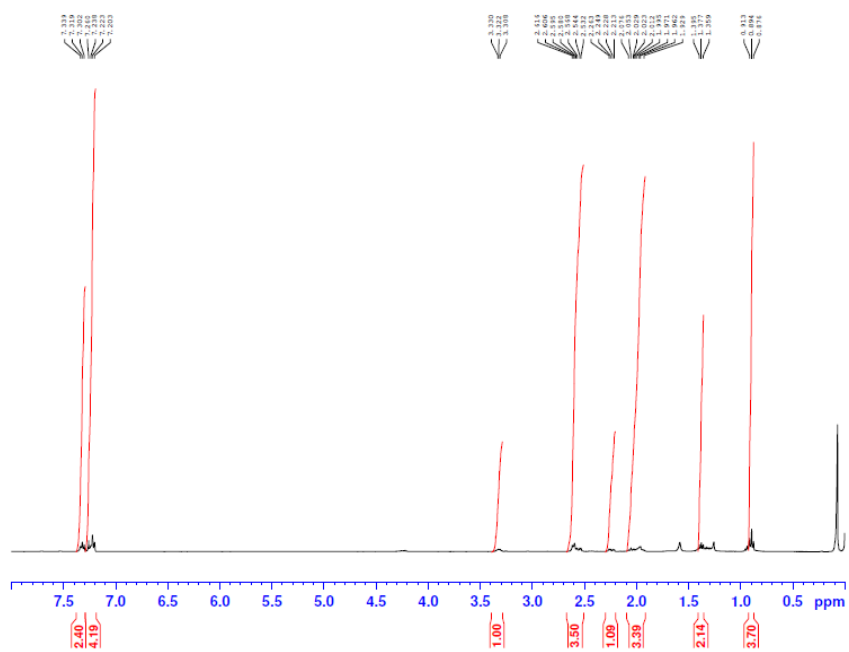

$^{13}\text{C}$  NMR: **3I**

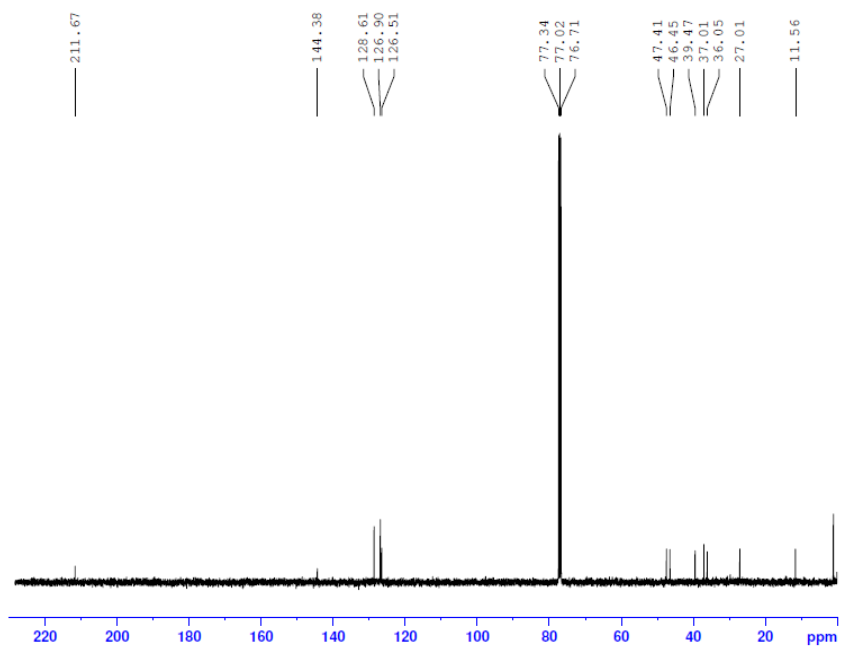

HPLC Data: 3I

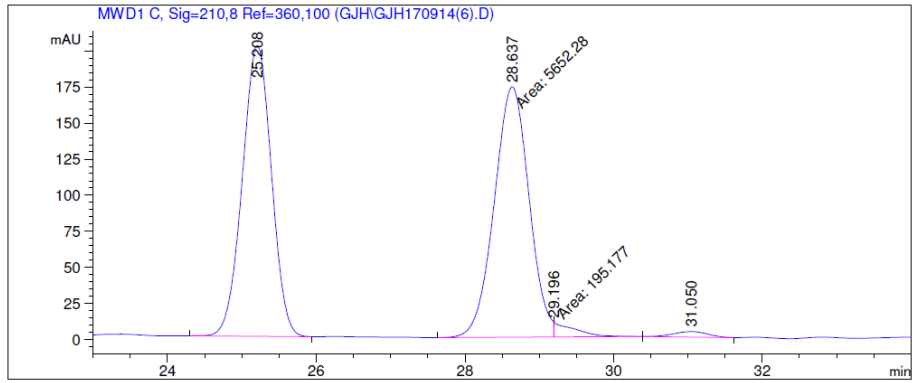

| Peak # | RetTime [min] | Type | Width [min] | Area [mAU*s] | Height [mAU] | Area %  |
|--------|---------------|------|-------------|--------------|--------------|---------|
| 1      | 25.208        | BB   | 0.4259      | 5485.90674   | 201.32001    | 47.8861 |
| 2      | 28.637        | MF   | 0.5431      | 5652.28076   | 173.45670    | 49.3384 |
| 3      | 29.196        | FM   | 0.3107      | 195.17708    | 10.47091     | 1.7037  |
| 4      | 31.050        | BB   | 0.4395      | 122.78938    | 3.87711      | 1.0718  |

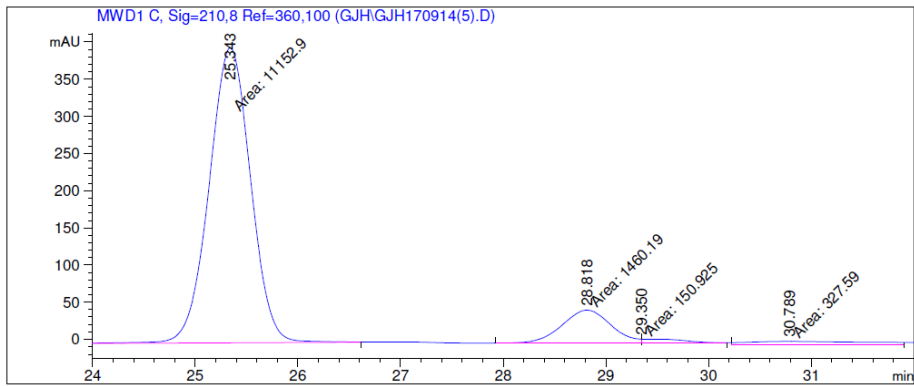

| Peak # | RetTime [min] | Type | Width [min] | Area [mAU*s] | Height [mAU] | Area %  |
|--------|---------------|------|-------------|--------------|--------------|---------|
| 1      | 25.343        | MM   | 0.4682      | 1.11529e4    | 397.03714    | 85.1913 |
| 2      | 28.818        | MF   | 0.5501      | 1460.18933   | 44.23964     | 11.1536 |
| 3      | 29.350        | FM   | 0.4068      | 150.92473    | 5.23982      | 1.1528  |
| 4      | 30.789        | MM   | 1.3662      | 327.58966    | 3.99642      | 2.5023  |

3-propyl-5-phenylcyclohexanone (**3m**):

<sup>1</sup>H NMR: **3m**

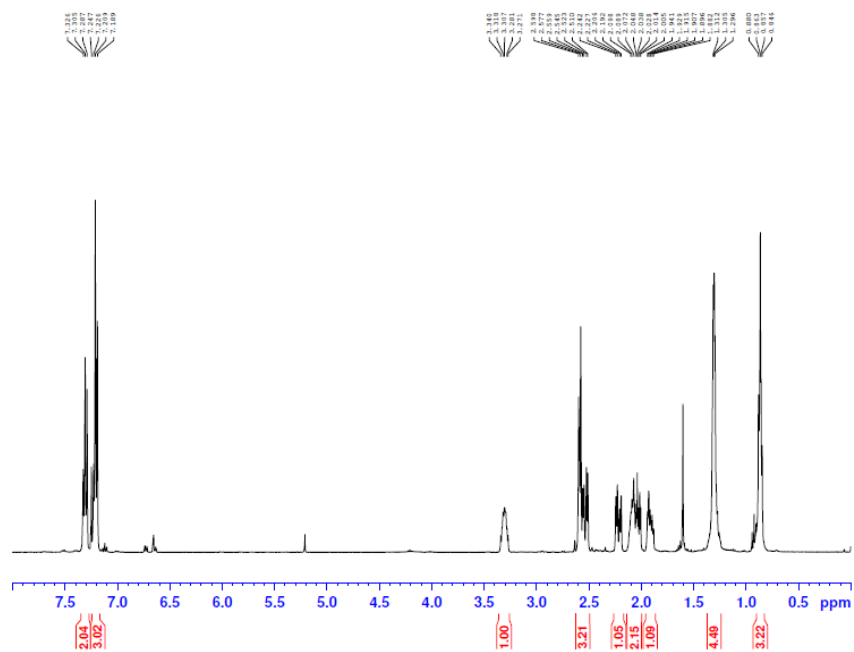

<sup>13</sup>C NMR: **3m**

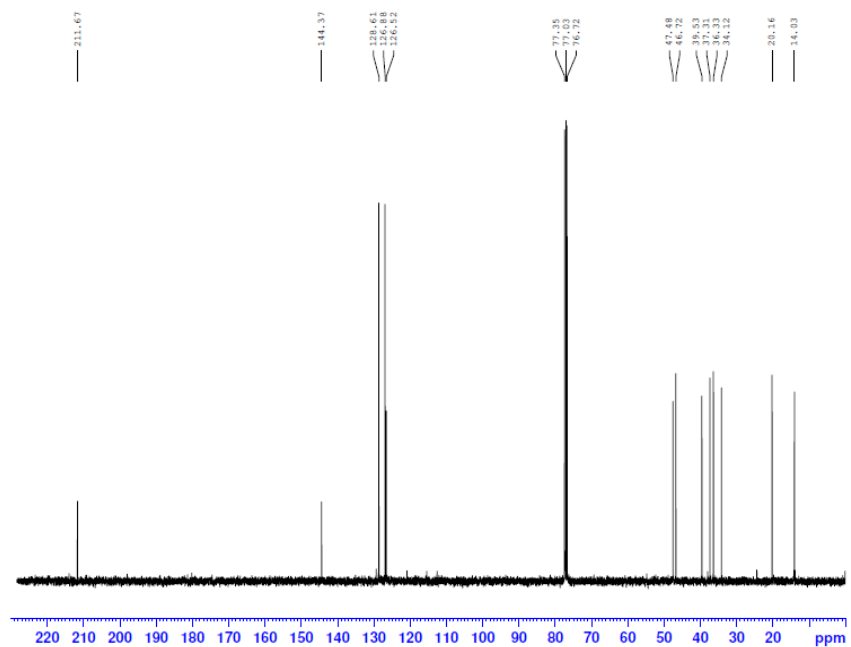

HPLC Data: 3m

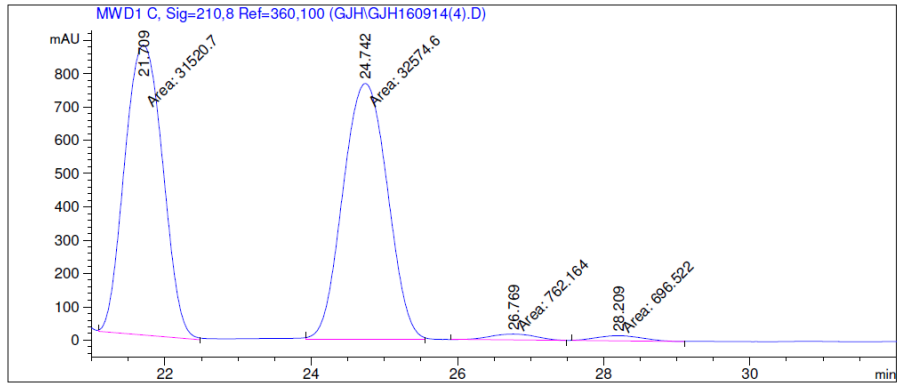

| Peak # | RetTime [min] | Type | Width [min] | Area [mAU*s] | Height [mAU] | Area %  |
|--------|---------------|------|-------------|--------------|--------------|---------|
| 1      | 21.709        | MM   | 0.6035      | 3.15207e4    | 870.50464    | 48.0835 |
| 2      | 24.742        | MM   | 0.7056      | 3.25746e4    | 769.40942    | 49.6913 |
| 3      | 26.769        | MM   | 0.7278      | 762.16425    | 17.45461     | 1.1627  |
| 4      | 28.209        | MM   | 0.7518      | 696.52191    | 15.44068     | 1.0625  |

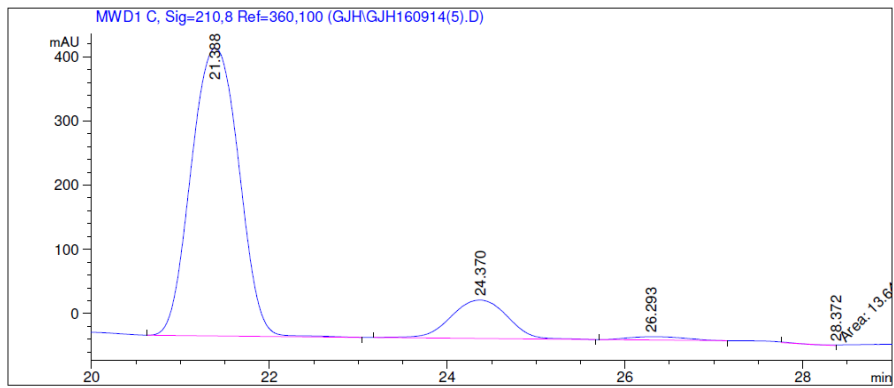

| Peak # | RetTime [min] | Type | Width [min] | Area [mAU*s] | Height [mAU] | Area %  |
|--------|---------------|------|-------------|--------------|--------------|---------|
| 1      | 21.388        | BB   | 0.5327      | 1.66249e4    | 448.25552    | 85.2768 |
| 2      | 24.370        | VB   | 0.5895      | 2633.90259   | 59.83903     | 13.5105 |
| 3      | 26.293        | BB   | 0.5336      | 222.76559    | 5.02065      | 1.1427  |
| 4      | 28.372        | MM   | 0.1810      | 13.64805     | 1.25680      | 0.0700  |

3-butyl-5-phenylcyclohexanone (**3n**):

<sup>1</sup>H NMR: **3n**

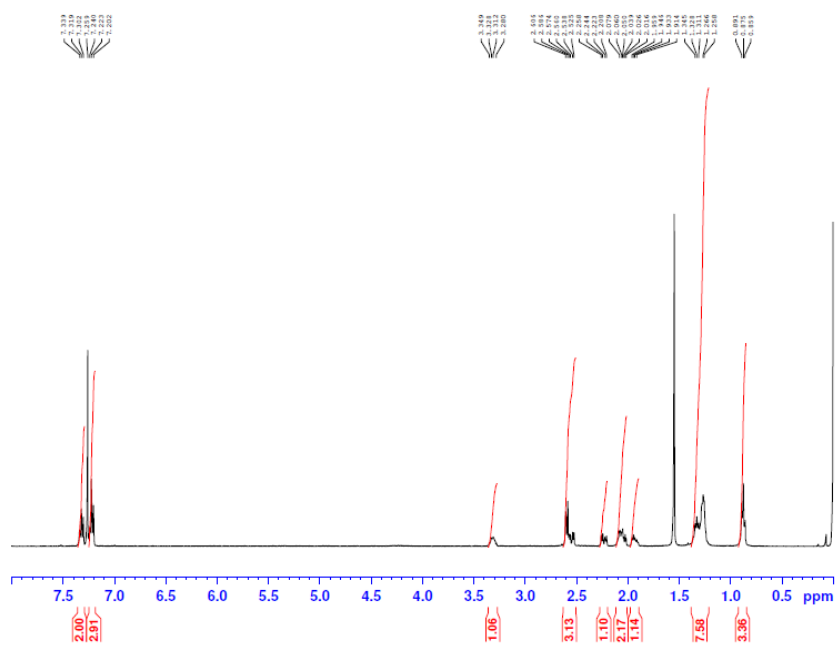

<sup>13</sup>C NMR: **3n**

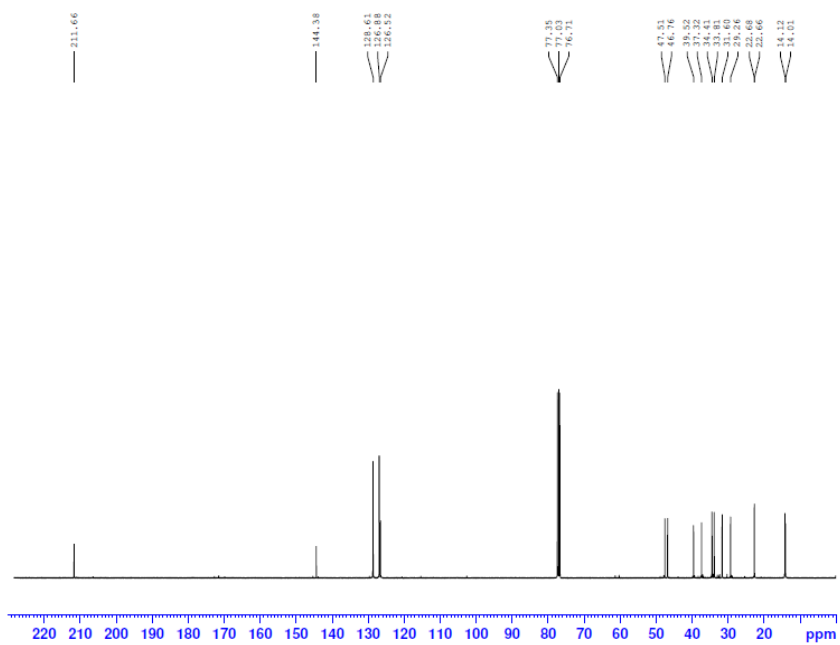

HPLC Data: 3n

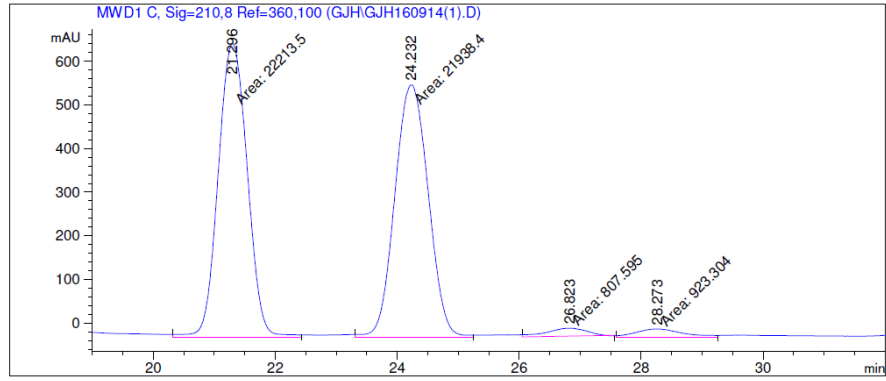

| Peak # | RetTime [min] | Type | Width [min] | Area [mAU*s] | Height [mAU] | Area %  |
|--------|---------------|------|-------------|--------------|--------------|---------|
| 1      | 21.296        | MM   | 0.5513      | 2.22135e4    | 671.57471    | 48.4135 |
| 2      | 24.232        | MM   | 0.6336      | 2.19384e4    | 577.10693    | 47.8140 |
| 3      | 26.823        | MM   | 0.7617      | 807.59485    | 17.67075     | 1.7601  |
| 4      | 28.273        | MM   | 0.8609      | 923.30389    | 17.87581     | 2.0123  |

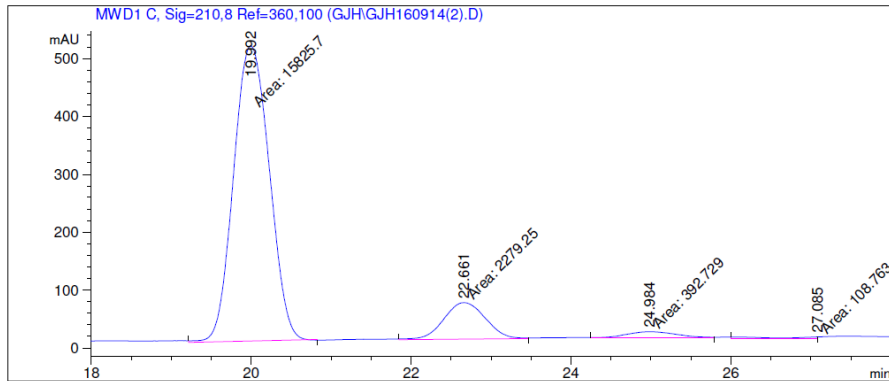

| Peak # | RetTime [min] | Type | Width [min] | Area [mAU*s] | Height [mAU] | Area %  |
|--------|---------------|------|-------------|--------------|--------------|---------|
| 1      | 19.992        | MM   | 0.5171      | 1.58257e4    | 510.09460    | 85.0549 |
| 2      | 22.661        | MM   | 0.6025      | 2279.24585   | 63.05064     | 12.2498 |
| 3      | 24.984        | MM   | 0.6745      | 392.72897    | 9.70410      | 2.1107  |
| 4      | 27.085        | MM   | 0.6596      | 108.76315    | 2.74835      | 0.5845  |

3-ethyl-5-*p*-methoxyphenylcyclohexanone (**3o**):

<sup>1</sup>H NMR: **3o**

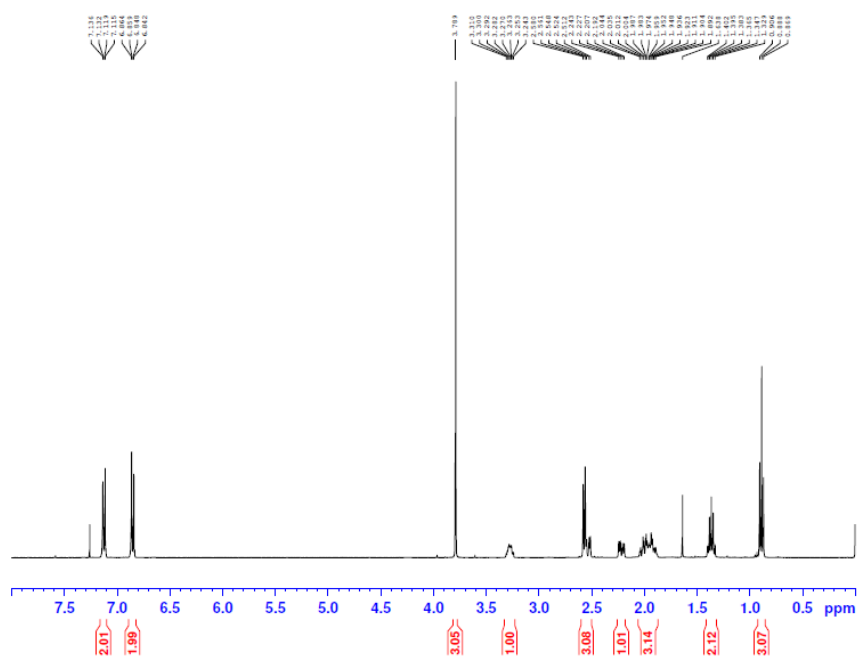

<sup>13</sup>C NMR: **3o**

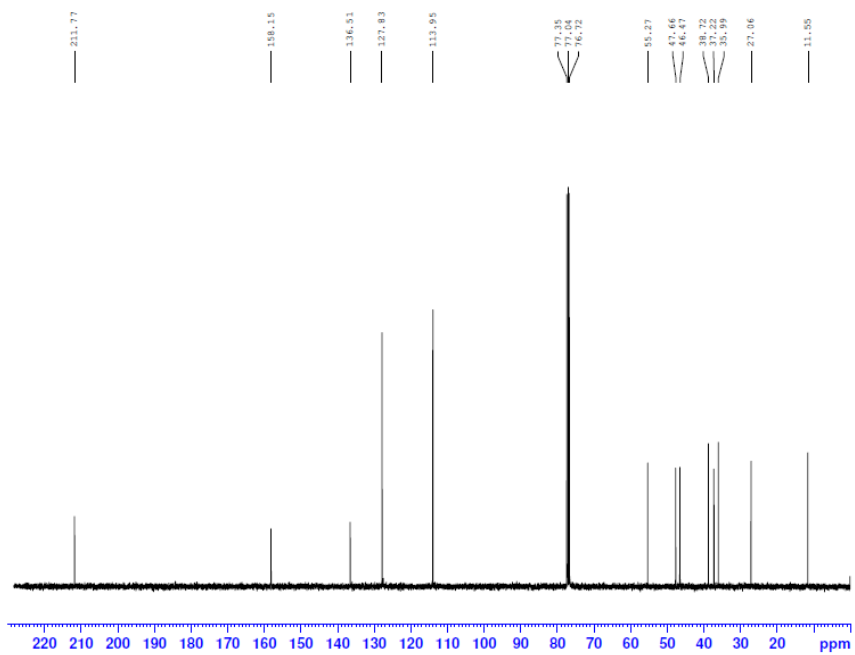



HPLC Data: 3o

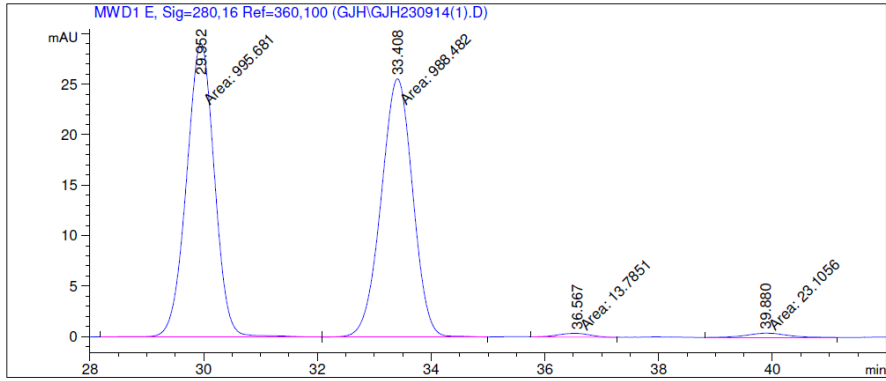

| Peak # | RetTime [min] | Type | Width [min] | Area [mAU*s] | Height [mAU] | Area %  |
|--------|---------------|------|-------------|--------------|--------------|---------|
| 1      | 29.952        | MF   | 0.5708      | 995.68146    | 29.07209     | 49.2655 |
| 2      | 33.408        | FM   | 0.6442      | 988.48193    | 25.57559     | 48.9092 |
| 3      | 36.567        | MM   | 0.6226      | 13.78510     | 3.69015e-1   | 0.6821  |
| 4      | 39.880        | MM   | 0.8613      | 23.10562     | 4.47105e-1   | 1.1432  |

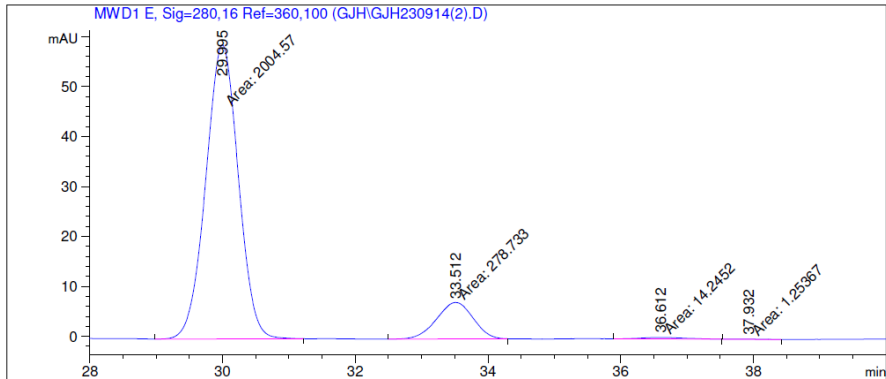

| Peak # | RetTime [min] | Type | Width [min] | Area [mAU*s] | Height [mAU] | Area %  |
|--------|---------------|------|-------------|--------------|--------------|---------|
| 1      | 29.995        | MM   | 0.5675      | 2004.57336   | 58.87435     | 87.2007 |
| 2      | 33.512        | MM   | 0.6374      | 278.73306    | 7.28848      | 12.1251 |
| 3      | 36.612        | MM   | 0.7564      | 14.24523     | 3.13894e-1   | 0.6197  |
| 4      | 37.932        | MM   | 0.4511      | 1.25367      | 4.63169e-2   | 0.0545  |

3-propyl-5-*p*-methoxyphenylcyclohexanone (**3p**):

<sup>1</sup>H NMR: **3p**

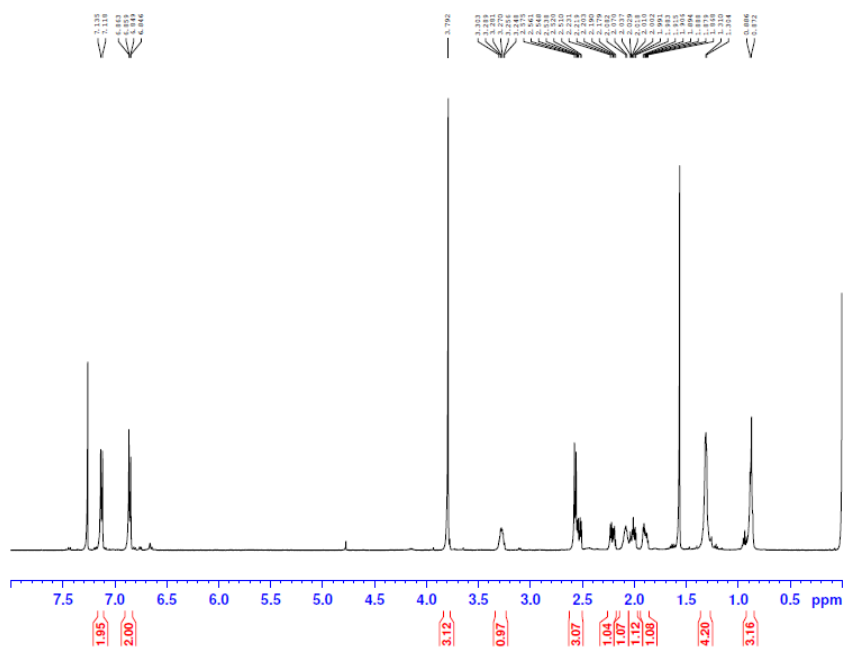

<sup>13</sup>C NMR: **3p**

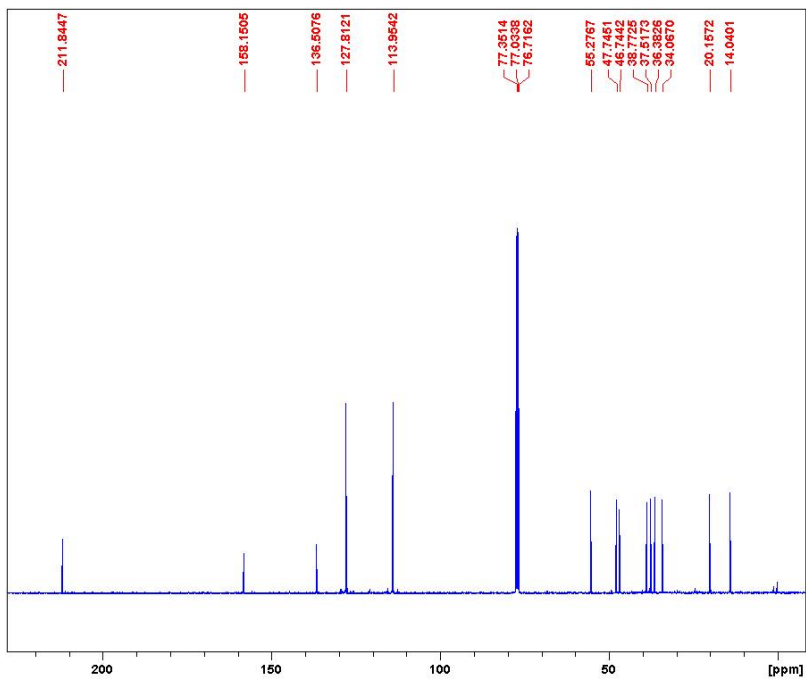

HPLC Data: 3p

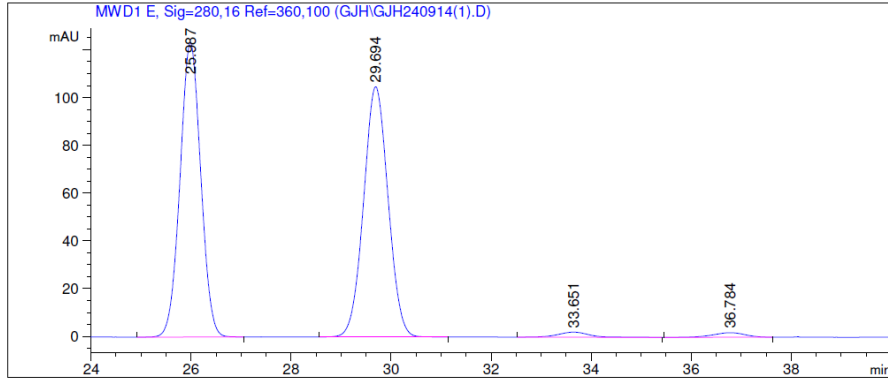

| Peak # | RetTime [min] | Type | Width [min] | Area [mAU*s] | Height [mAU] | Area %  |
|--------|---------------|------|-------------|--------------|--------------|---------|
| 1      | 25.987        | BB   | 0.4460      | 3548.25952   | 123.21095    | 48.5950 |
| 2      | 29.694        | BB   | 0.5278      | 3571.70972   | 104.76304    | 48.9162 |
| 3      | 33.651        | BB   | 0.5677      | 94.63482     | 2.18304      | 1.2961  |
| 4      | 36.784        | BB   | 0.5616      | 87.08992     | 1.96304      | 1.1927  |

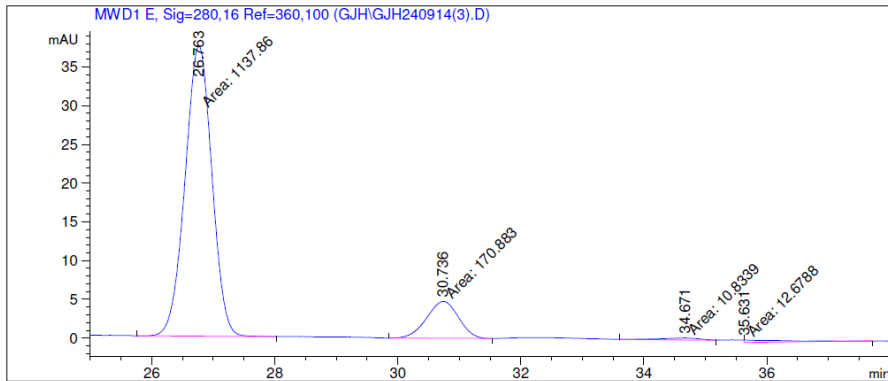

| Peak # | RetTime [min] | Type | Width [min] | Area [mAU*s] | Height [mAU] | Area %  |
|--------|---------------|------|-------------|--------------|--------------|---------|
| 1      | 26.763        | MM   | 0.5056      | 1137.85803   | 37.51098     | 85.4085 |
| 2      | 30.736        | MM   | 0.5986      | 170.88254    | 4.75775      | 12.8266 |
| 3      | 34.671        | MM   | 0.6941      | 10.83387     | 2.60153e-1   | 0.8132  |
| 4      | 35.631        | MM   | 0.6863      | 12.67878     | 3.07884e-1   | 0.9517  |

3-butyl-5-*p*-methoxyphenylcyclohexanone (**3q**):

<sup>1</sup>H NMR: **3q**

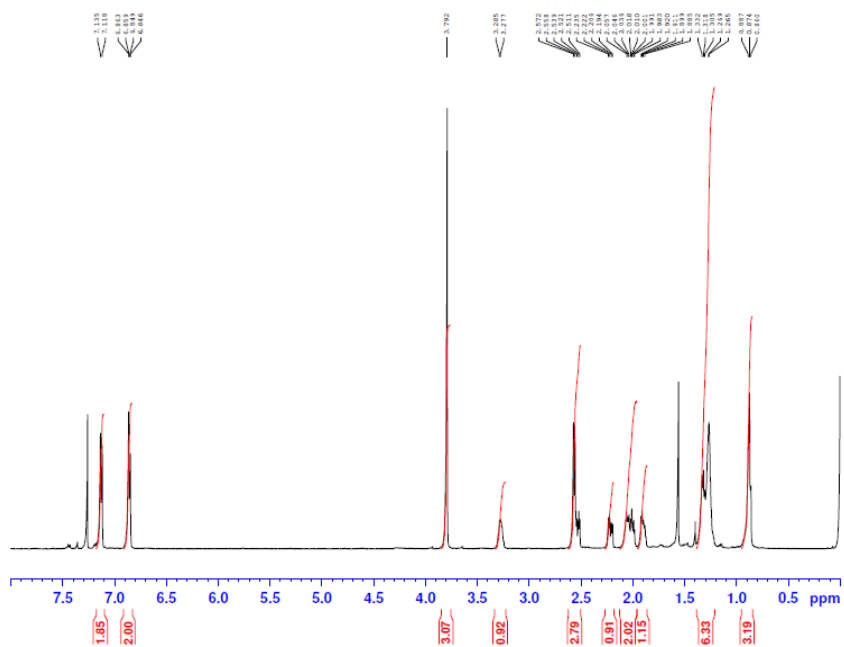

<sup>13</sup>C NMR: **3q**

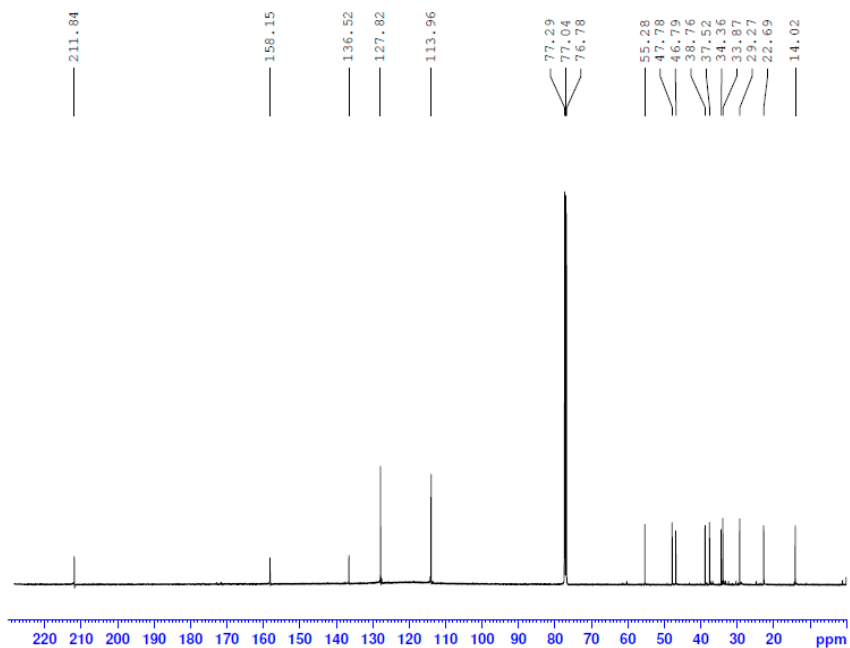

HPLC Data: 3q

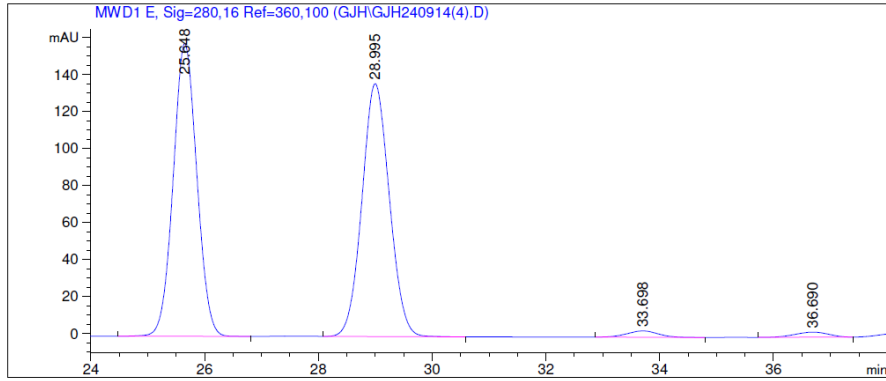

| Peak # | RetTime [min] | Type | Width [min] | Area [mAU*s] | Height [mAU] | Area %  |
|--------|---------------|------|-------------|--------------|--------------|---------|
| 1      | 25.648        | BB   | 0.4485      | 4561.59375   | 158.16008    | 48.6387 |
| 2      | 28.995        | BB   | 0.5164      | 4572.13379   | 136.64035    | 48.7511 |
| 3      | 33.698        | BB   | 0.5671      | 130.67569    | 3.36480      | 1.3933  |
| 4      | 36.690        | BB   | 0.5733      | 114.12888    | 2.80149      | 1.2169  |

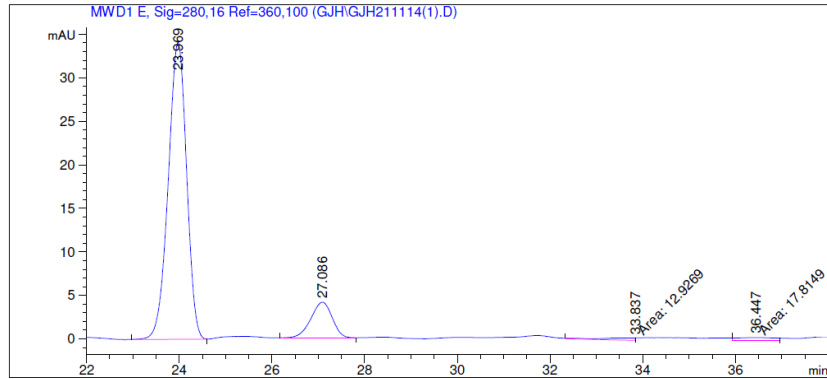

| Peak # | RetTime [min] | Type | Width [min] | Area [mAU*s] | Height [mAU] | Area %  |
|--------|---------------|------|-------------|--------------|--------------|---------|
| 1      | 23.969        | BB   | 0.4270      | 938.76880    | 34.11982     | 85.2806 |
| 2      | 27.086        | BB   | 0.4845      | 131.28900    | 4.09043      | 11.9267 |
| 3      | 33.837        | MM   | 0.7626      | 12.92695     | 2.82538e-1   | 1.1743  |
| 4      | 36.447        | MM   | 0.9104      | 17.81489     | 3.26152e-1   | 1.6184  |

## 1.4

### Computational Details

DFT calculations were performed with the Gaussian 09 package.<sup>[1]</sup> Both intermediates and transition state structures involved in the rate-determining step are fully optimized by BP86<sup>[2]</sup> method using general basis set: 6-31G(d)<sup>[3]</sup> for H, C, O and P, SDD<sup>[4]</sup> for Fe and Pd. The SDD ECP is used for Fe and Pd as well. Also, harmonic vibrational frequencies are calculated on the optimized geometries to validate whether they are local minimum or transition state.

### Computational Results and Discussions

Table 1 Energetic information of the Intermediates and Transition States

| The Intermediate | ZPE-corrected Energy (a.u.) | Relative Energy (kcal/mol) | Transition States (TS) | ZPE-corrected Energy (a.u.) | Activation Energy (kcal/mol) | Product       |
|------------------|-----------------------------|----------------------------|------------------------|-----------------------------|------------------------------|---------------|
| 1                | -2442.4315                  | 1.63                       | 1                      | -2442.4170                  | 9.10                         | <b>3R, 5R</b> |
| 2                | -2442.4341                  | 0.00                       | 2                      | -2442.4192                  | 9.35                         | 3R, 5S        |
| 3                | -2442.4323                  | 1.75                       | 3                      | -2442.4143                  | 11.29                        | 3S, 5S        |
| 4                | -2442.4347                  | 2.00                       | 4                      | -2442.4171                  | 11.04                        | 3S, 5R        |

The calculation results show that the formation of Intermediate 1 is slight energy favored than that of Intermediate 2, and the activation barrier in the pathway from Intermediate 1 to TS1 is slighter lower than that in the pathway from Intermediate 2 to TS2. So the first reaction pathway is more preferred and it leads to the formation of the main product with 3R, 5R chirality. This conclusion is in agreement with the experimental result.

#### Intermediate 1

Fe -1.791424 -2.869574 -0.108136  
Pd -1.339982 0.713223 -0.205715  
C -1.234435 -1.129494 -1.101130  
C -0.096766 -2.014472 -0.878008  
C -0.361633 -3.287992 -1.503796  
H 0.293030 -4.162865 -1.487912  
C -1.657767 -3.209630 -2.119430  
H -2.167123 -4.020495 -2.644770  
C -2.193264 -1.899101 -1.864755  
H -3.179826 -1.559189 -2.174541  
C -1.531847 -3.229309 1.906221  
H -0.636282 -3.004481 2.486190  
C -1.802159 -4.454147 1.202883  
H -1.142863 -5.322182 1.149779  
C -3.079123 -4.322993 0.552292  
H -3.552928 -5.069360 -0.087342  
C -3.598518 -3.014546 0.851842  
H -4.531851 -2.593596 0.476647  
C -2.645138 -2.342080 1.693029  
H -2.729831 -1.321934 2.067766  
C 1.201842 -1.586203 -0.249531

|   |           |           |           |
|---|-----------|-----------|-----------|
| H | 1.553053  | -2.315014 | 0.500681  |
| C | 2.293951  | -1.463028 | -1.334212 |
| H | 2.144184  | -0.583756 | -1.983395 |
| H | 2.184721  | -2.328471 | -2.019880 |
| C | 3.730558  | -1.493176 | -0.823873 |
| O | 4.458074  | -0.926274 | -3.105498 |
| C | 4.797601  | -1.230587 | -1.797138 |
| C | 6.175726  | -1.241966 | -1.669060 |
| H | 6.715850  | -1.453911 | -0.748402 |
| C | 6.710468  | -0.929486 | -2.952937 |
| H | 7.759624  | -0.847764 | -3.233136 |
| C | 5.625962  | -0.748531 | -3.783997 |
| H | 5.522410  | -0.500893 | -4.838455 |
| C | 2.179064  | 1.173584  | 0.399886  |
| C | 3.127171  | 1.521795  | 1.382308  |
| H | 3.057173  | 1.089573  | 2.383544  |
| C | 4.159111  | 2.424995  | 1.084343  |
| H | 4.884357  | 2.687821  | 1.861460  |
| C | 4.264010  | 2.988938  | -0.195910 |
| H | 5.074498  | 3.688720  | -0.424963 |
| C | 3.315547  | 2.662671  | -1.178306 |
| H | 3.376947  | 3.110182  | -2.176091 |
| C | 2.271304  | 1.775090  | -0.877671 |
| H | 1.505561  | 1.561672  | -1.633157 |
| C | 0.945906  | -0.519173 | 2.471835  |
| C | 2.048939  | -1.296981 | 2.895639  |
| H | 2.833930  | -1.567807 | 2.180766  |
| C | 2.138585  | -1.723758 | 4.229357  |
| H | 2.997785  | -2.324775 | 4.545871  |
| C | 1.134419  | -1.387292 | 5.151303  |
| H | 1.205546  | -1.726865 | 6.190073  |
| C | 0.038353  | -0.616748 | 4.736499  |
| H | -0.748899 | -0.349617 | 5.448880  |
| C | -0.054263 | -0.183338 | 3.405505  |
| H | -0.907761 | 0.419046  | 3.090624  |
| O | 4.033967  | -1.775094 | 0.344405  |
| P | 0.774362  | 0.009676  | 0.708908  |
| C | -3.028173 | 0.889332  | -1.411459 |
| C | -2.925758 | 1.297212  | -2.757194 |
| C | -4.312241 | 0.577270  | -0.912282 |
| C | -4.065138 | 1.391312  | -3.578034 |
| H | -1.943167 | 1.530715  | -3.184196 |
| C | -5.453009 | 0.663325  | -1.731697 |
| H | -4.431235 | 0.251214  | 0.128470  |
| C | -5.333759 | 1.071616  | -3.069973 |
| H | -3.956120 | 1.709555  | -4.621854 |
| H | -6.437204 | 0.408866  | -1.320181 |
| H | -6.220445 | 1.139228  | -3.709574 |
| C | -1.462284 | 2.491853  | 1.314177  |
| H | -1.972637 | 1.956295  | 2.124437  |
| C | -2.188707 | 2.888720  | 0.191650  |

|   |           |          |           |
|---|-----------|----------|-----------|
| H | -3.261390 | 2.686124 | 0.168769  |
| C | -0.225623 | 3.215237 | 1.729218  |
| C | -1.662866 | 3.944534 | -0.766536 |
| H | -1.048388 | 3.472013 | -1.555214 |
| H | -2.512611 | 4.421565 | -1.285653 |
| C | -0.803542 | 5.003746 | -0.029528 |
| C | 0.305259  | 4.282781 | 0.771684  |
| H | 0.913708  | 4.985956 | 1.365712  |
| H | 0.994320  | 3.774958 | 0.068378  |
| H | -0.315401 | 5.633050 | -0.798733 |
| O | 0.295885  | 3.011447 | 2.829959  |
| C | -1.650885 | 5.926500 | 0.864803  |
| H | -1.017556 | 6.685654 | 1.356472  |
| H | -2.419308 | 6.456050 | 0.274380  |
| H | -2.167801 | 5.360714 | 1.660343  |

#### TS1

|    |           |           |           |
|----|-----------|-----------|-----------|
| Fe | -1.438963 | -3.030753 | -0.169848 |
| Pd | -1.319020 | 0.612149  | -0.084140 |
| C  | -1.102592 | -1.173047 | -1.063219 |
| C  | 0.116126  | -1.959272 | -0.951058 |
| C  | -0.057043 | -3.207094 | -1.657596 |
| H  | 0.674059  | -4.015115 | -1.741731 |
| C  | -1.389393 | -3.212477 | -2.202023 |
| H  | -1.847073 | -4.031821 | -2.761053 |
| C  | -2.031067 | -1.979735 | -1.822533 |
| H  | -3.064291 | -1.719585 | -2.049898 |
| C  | -1.018415 | -3.455644 | 1.799607  |
| H  | -0.122515 | -3.154110 | 2.344461  |
| C  | -1.185832 | -4.668411 | 1.044062  |
| H  | -0.432968 | -5.445637 | 0.902304  |
| C  | -2.507789 | -4.659075 | 0.474669  |
| H  | -2.930066 | -5.424539 | -0.178593 |
| C  | -3.156820 | -3.439615 | 0.877499  |
| H  | -4.155511 | -3.117747 | 0.580004  |
| C  | -2.239159 | -2.699164 | 1.701338  |
| H  | -2.417417 | -1.717921 | 2.141803  |
| C  | 1.368631  | -1.460099 | -0.277410 |
| H  | 1.724257  | -2.173756 | 0.484287  |
| C  | 2.512954  | -1.270305 | -1.296398 |
| H  | 2.395652  | -0.359935 | -1.908474 |
| H  | 2.456386  | -2.105045 | -2.024918 |
| C  | 3.914479  | -1.319402 | -0.695011 |
| O  | 4.786656  | -0.511046 | -2.849704 |
| C  | 5.039644  | -0.943213 | -1.558060 |
| C  | 6.405696  | -0.954152 | -1.334373 |
| H  | 6.884027  | -1.253958 | -0.403969 |
| C  | 7.022899  | -0.507901 | -2.539089 |
| H  | 8.087439  | -0.387821 | -2.734654 |
| C  | 5.995493  | -0.254007 | -3.422190 |
| H  | 5.961381  | 0.099083  | -4.450795 |



|   |           |           |           |
|---|-----------|-----------|-----------|
| C | 2.074856  | 1.411999  | 0.261680  |
| C | 3.094147  | 1.786265  | 1.159699  |
| H | 3.155767  | 1.312020  | 2.143056  |
| C | 4.028953  | 2.769112  | 0.799050  |
| H | 4.810523  | 3.055555  | 1.510403  |
| C | 3.965162  | 3.381379  | -0.461374 |
| H | 4.698239  | 4.145861  | -0.739310 |
| C | 2.951198  | 3.017187  | -1.362157 |
| H | 2.888462  | 3.496225  | -2.345183 |
| C | 2.004471  | 2.048396  | -0.998491 |
| H | 1.193672  | 1.785936  | -1.688921 |
| C | 1.069229  | -0.259498 | 2.451927  |
| C | 2.050454  | -1.175812 | 2.894851  |
| H | 2.729255  | -1.650441 | 2.179038  |
| C | 2.190993  | -1.448800 | 4.264959  |
| H | 2.953567  | -2.162590 | 4.594525  |
| C | 1.368991  | -0.808761 | 5.204949  |
| H | 1.479672  | -1.028137 | 6.272307  |
| C | 0.416588  | 0.125852  | 4.771483  |
| H | -0.211299 | 0.651401  | 5.498546  |
| C | 0.262951  | 0.399650  | 3.404372  |
| H | -0.444431 | 1.168771  | 3.083545  |
| O | 4.143069  | -1.712545 | 0.458675  |
| P | 0.818669  | 0.115862  | 0.659149  |
| C | -3.273729 | 0.850639  | -1.033480 |
| C | -3.367702 | 0.995673  | -2.435904 |
| C | -4.335972 | 0.189916  | -0.364769 |
| C | -4.468070 | 0.488285  | -3.146472 |
| H | -2.566080 | 1.496710  | -2.987923 |
| C | -5.427890 | -0.329916 | -1.072180 |
| H | -4.308836 | 0.087634  | 0.726992  |
| C | -5.501598 | -0.177673 | -2.469549 |
| H | -4.512709 | 0.609729  | -4.234686 |
| H | -6.231096 | -0.844841 | -0.532956 |
| H | -6.362259 | -0.568790 | -3.022185 |
| C | -1.840760 | 2.424069  | 1.061089  |
| H | -2.266583 | 2.008919  | 1.987426  |
| C | -2.750256 | 2.568093  | -0.063170 |
| H | -3.807313 | 2.597427  | 0.220142  |
| C | -0.777261 | 3.412623  | 1.327425  |
| C | -2.372676 | 3.568288  | -1.155612 |
| H | -1.628173 | 3.118457  | -1.836276 |
| H | -3.261009 | 3.807611  | -1.766337 |
| C | -1.744667 | 4.852098  | -0.560092 |
| C | -0.486892 | 4.455997  | 0.243203  |
| H | -0.021705 | 5.324805  | 0.739783  |
| H | 0.273599  | 4.030176  | -0.440540 |
| H | -1.428415 | 5.483260  | -1.413805 |
| O | -0.185900 | 3.450834  | 2.418170  |
| C | -2.737366 | 5.669651  | 0.286289  |
| H | -2.269897 | 6.604485  | 0.641929  |

H -3.633763 5.940560 -0.299725  
H -3.071052 5.109398 1.177889

Intermediate 2

Fe -2.193228 -2.589057 -0.481735  
Pd -1.280546 0.899517 -0.031493  
C -1.442375 -0.783922 -1.191675  
C -0.421803 -1.825851 -1.164929  
C -0.857322 -2.931248 -1.985114  
H -0.320045 -3.869928 -2.141415  
C -2.145591 -2.592488 -2.524911  
H -2.763643 -3.233961 -3.156939  
C -2.506188 -1.290254 -2.032071  
H -3.448273 -0.785517 -2.237989  
C -1.925777 -3.320169 1.426598  
H -0.994259 -3.304195 1.993139  
C -2.362439 -4.364851 0.539650  
H -1.814088 -5.278982 0.305978  
C -3.631231 -3.976056 -0.017574  
H -4.209471 -4.540073 -0.751242  
C -3.979740 -2.689478 0.525038  
H -4.866312 -2.106491 0.273108  
C -2.928897 -2.287897 1.421431  
H -2.878604 -1.346950 1.969429  
C 0.925083 -1.683181 -0.508685  
H 1.172164 -2.563443 0.108997  
C 2.028900 -1.542560 -1.579668  
H 1.986970 -0.575082 -2.106728  
H 1.822351 -2.295652 -2.368299  
C 3.445847 -1.818108 -1.086922  
O 4.292532 -0.823016 -3.174475  
C 4.559729 -1.446848 -1.966717  
C 5.925802 -1.626092 -1.832519  
H 6.413369 -2.094240 -0.979672  
C 6.528309 -1.087948 -3.006664  
H 7.588794 -1.051311 -3.251552  
C 5.492871 -0.615721 -3.784231  
H 5.447053 -0.128259 -4.755931  
C 2.280216 0.773578 0.532994  
C 3.280507 0.825091 1.524651  
H 3.163215 0.252581 2.448410  
C 4.428945 1.609043 1.334006  
H 5.193603 1.641314 2.117130  
C 4.600835 2.344532 0.151776  
H 5.501815 2.949379 0.005410  
C 3.604601 2.312377 -0.837163  
H 3.720528 2.895056 -1.757221  
C 2.445694 1.546835 -0.640494  
H 1.649884 1.562822 -1.394871  
C 0.828282 -1.031951 2.354933  
C 1.795216 -2.028272 2.626556

|   |           |           |           |
|---|-----------|-----------|-----------|
| H | 2.524894  | -2.308984 | 1.858838  |
| C | 1.822089  | -2.660113 | 3.879322  |
| H | 2.575508  | -3.429816 | 4.078154  |
| C | 0.889851  | -2.312357 | 4.870121  |
| H | 0.911297  | -2.811597 | 5.844676  |
| C | -0.069909 | -1.324187 | 4.606718  |
| H | -0.798948 | -1.044820 | 5.374209  |
| C | -0.099692 | -0.686532 | 3.357545  |
| H | -0.840875 | 0.090049  | 3.163288  |
| O | 3.689863  | -2.387618 | -0.012975 |
| P | 0.726807  | -0.217400 | 0.699311  |
| C | -2.952055 | 1.475167  | -1.128645 |
| C | -2.827837 | 2.074335  | -2.398982 |
| C | -4.253095 | 1.255604  | -0.625074 |
| C | -3.963786 | 2.443022  | -3.143338 |
| H | -1.832856 | 2.245198  | -2.826919 |
| C | -5.391502 | 1.617280  | -1.369377 |
| H | -4.387668 | 0.783432  | 0.355789  |
| C | -5.251125 | 2.213511  | -2.632993 |
| H | -3.838624 | 2.904899  | -4.130133 |
| H | -6.390793 | 1.429057  | -0.958602 |
| H | -6.136100 | 2.495008  | -3.213895 |
| C | -1.163880 | 2.446810  | 1.729073  |
| H | -1.790684 | 1.895860  | 2.441739  |
| C | -1.761910 | 3.113697  | 0.661054  |
| H | -2.851120 | 3.109730  | 0.587357  |
| C | 0.157140  | 2.879457  | 2.268869  |
| C | -1.021986 | 4.180113  | -0.126516 |
| H | -0.444330 | 3.723936  | -0.953796 |
| H | -1.752546 | 4.858515  | -0.600849 |
| C | -0.051944 | 4.968622  | 0.783718  |
| C | 0.890740  | 3.981764  | 1.504109  |
| H | 1.555913  | 4.493327  | 2.221052  |
| H | 1.544208  | 3.492097  | 0.754202  |
| O | 0.590999  | 2.429700  | 3.334143  |
| H | -0.661862 | 5.483787  | 1.554401  |
| C | 0.728305  | 6.031153  | -0.003124 |
| H | 0.045835  | 6.748186  | -0.493255 |
| H | 1.401650  | 6.603168  | 0.659276  |
| H | 1.348555  | 5.562615  | -0.789339 |

#### TS2

|    |           |           |           |
|----|-----------|-----------|-----------|
| Fe | -1.746452 | -2.847176 | -0.450603 |
| Pd | -1.278879 | 0.712700  | 0.035817  |
| C  | -1.232021 | -0.948861 | -1.157141 |
| C  | -0.096254 | -1.858940 | -1.142361 |
| C  | -0.394864 | -3.005539 | -1.968333 |
| H  | 0.251575  | -3.869647 | -2.141611 |
| C  | -1.722766 | -2.824275 | -2.491862 |
| H  | -2.261182 | -3.533331 | -3.124844 |
| C  | -2.237318 | -1.578731 | -1.982777 |

H -3.239797 -1.196654 -2.172354  
C -1.371194 -3.489651 1.470261  
H -0.455761 -3.306133 2.033971  
C -1.625902 -4.607524 0.601919  
H -0.934282 -5.423797 0.386670  
C -2.939887 -4.442496 0.037564  
H -3.415076 -5.107928 -0.685251  
C -3.496612 -3.221086 0.556692  
H -4.465947 -2.795905 0.293819  
C -2.530078 -2.636706 1.447364  
H -2.637361 -1.694291 1.985078  
C 1.203047 -1.553452 -0.443320  
H 1.513580 -2.387783 0.207752  
C 2.334688 -1.307904 -1.463175  
H 2.252021 -0.325059 -1.958036  
H 2.215627 -2.044434 -2.284132  
C 3.743234 -1.498811 -0.909281  
O 4.614998 -0.518248 -2.991280  
C 4.869825 -1.091653 -1.756190  
C 6.237498 -1.192597 -1.567737  
H 6.717129 -1.608574 -0.683884  
C 6.853871 -0.656780 -2.735813  
H 7.919278 -0.569818 -2.943796  
C 5.824379 -0.264248 -3.564003  
H 5.788959 0.192602 -4.550875  
C 2.172877 1.138986 0.485227  
C 3.220831 1.279351 1.416088  
H 3.232411 0.664215 2.319750  
C 4.246608 2.210228 1.191236  
H 5.050254 2.314405 1.927624  
C 4.245427 3.002940 0.033960  
H 5.049798 3.725703 -0.138422  
C 3.203209 2.873140 -0.898063  
H 3.188642 3.494674 -1.799819  
C 2.166373 1.957178 -0.667120  
H 1.333758 1.879097 -1.376782  
C 0.993989 -0.721682 2.422489  
C 1.943879 -1.720288 2.738438  
H 2.618603 -2.104814 1.966431  
C 2.050737 -2.195937 4.055047  
H 2.788771 -2.970818 4.288462  
C 1.224286 -1.680498 5.065810  
H 1.308915 -2.057909 6.090498  
C 0.299531 -0.670688 4.760591  
H -0.333528 -0.246497 5.546859  
C 0.181757 -0.192877 3.447113  
H -0.507110 0.625463 3.225913  
O 3.972534 -2.025550 0.189569  
P 0.795012 -0.076905 0.702809  
C -3.185372 1.269496 -0.877114  
C -3.239577 1.610677 -2.247116

|   |           |           |           |
|---|-----------|-----------|-----------|
| C | -4.318598 | 0.634977  | -0.307393 |
| C | -4.371663 | 1.313945  | -3.024210 |
| H | -2.383224 | 2.100478  | -2.721715 |
| C | -5.444260 | 0.326879  | -1.082668 |
| H | -4.319099 | 0.383500  | 0.760206  |
| C | -5.477356 | 0.670005  | -2.447283 |
| H | -4.385101 | 1.582790  | -4.086526 |
| H | -6.303581 | -0.172706 | -0.621105 |
| H | -6.362087 | 0.443315  | -3.051439 |
| C | -1.642951 | 2.387878  | 1.421526  |
| H | -2.128183 | 1.892125  | 2.276125  |
| C | -2.507075 | 2.779121  | 0.322225  |
| H | -3.562375 | 2.881597  | 0.596473  |
| C | -0.487976 | 3.210048  | 1.833075  |
| C | -2.009015 | 3.878361  | -0.613699 |
| H | -1.286297 | 3.467448  | -1.343379 |
| H | -2.854813 | 4.283995  | -1.196221 |
| C | -1.290049 | 4.994241  | 0.176866  |
| C | -0.090617 | 4.378524  | 0.924238  |
| H | 0.429833  | 5.120549  | 1.554103  |
| H | 0.650449  | 4.009914  | 0.186104  |
| O | 0.091589  | 3.022029  | 2.913742  |
| H | -1.997868 | 5.396676  | 0.931182  |
| C | -0.863265 | 6.145404  | -0.746091 |
| H | -1.732923 | 6.601393  | -1.252088 |
| H | -0.346813 | 6.938815  | -0.177620 |
| H | -0.167387 | 5.786526  | -1.527268 |

### Intermediate 3

|    |           |           |           |
|----|-----------|-----------|-----------|
| Fe | -1.147615 | -3.069000 | 0.336154  |
| Pd | -1.199949 | 0.525358  | -0.617964 |
| C  | -0.845391 | -1.465331 | -0.958084 |
| C  | 0.414721  | -2.081458 | -0.554933 |
| C  | 0.398814  | -3.474584 | -0.932851 |
| H  | 1.191416  | -4.203475 | -0.746086 |
| C  | -0.860944 | -3.738632 | -1.571626 |
| H  | -1.200174 | -4.707928 | -1.943298 |
| C  | -1.622277 | -2.518404 | -1.575648 |
| H  | -2.635493 | -2.418705 | -1.960613 |
| C  | -0.930191 | -3.012883 | 2.385338  |
| H  | -0.115920 | -2.535418 | 2.931040  |
| C  | -0.954516 | -4.371862 | 1.915786  |
| H  | -0.157155 | -5.107161 | 2.035947  |
| C  | -2.201662 | -4.585418 | 1.230090  |
| H  | -2.509323 | -5.505821 | 0.731009  |
| C  | -2.949167 | -3.356478 | 1.273592  |
| H  | -3.921212 | -3.180921 | 0.811244  |
| C  | -2.165209 | -2.387250 | 1.991242  |
| H  | -2.439920 | -1.348148 | 2.171009  |
| C  | 1.591764  | -1.331584 | 0.012044  |
| H  | 2.001621  | -1.831834 | 0.906025  |

|   |           |           |           |
|---|-----------|-----------|-----------|
| C | 2.728992  | -1.233925 | -1.025996 |
| H | 2.499894  | -0.526807 | -1.841372 |
| H | 2.812004  | -2.218250 | -1.531139 |
| C | 4.103456  | -0.930665 | -0.435405 |
| O | 4.924821  | -0.596198 | -2.730416 |
| C | 5.193828  | -0.635639 | -1.371842 |
| C | 6.539024  | -0.386571 | -1.160709 |
| H | 7.024114  | -0.358371 | -0.186970 |
| C | 7.125549  | -0.182570 | -2.443682 |
| H | 8.167579  | 0.038746  | -2.669761 |
| C | 6.102620  | -0.321061 | -3.356998 |
| H | 6.052409  | -0.256876 | -4.442021 |
| C | 2.120164  | 1.633566  | 0.195642  |
| C | 2.909411  | 2.281515  | 1.166760  |
| H | 2.826734  | 1.993244  | 2.217661  |
| C | 3.796930  | 3.302309  | 0.794535  |
| H | 4.399641  | 3.797628  | 1.562939  |
| C | 3.909832  | 3.692638  | -0.548139 |
| H | 4.602490  | 4.491462  | -0.833027 |
| C | 3.118289  | 3.065099  | -1.522753 |
| H | 3.186782  | 3.371792  | -2.571878 |
| C | 2.222371  | 2.051792  | -1.152187 |
| H | 1.578271  | 1.592950  | -1.912558 |
| C | 0.906459  | 0.156759  | 2.435204  |
| C | 2.058270  | -0.328751 | 3.097498  |
| H | 2.952583  | -0.587644 | 2.519069  |
| C | 2.054560  | -0.483859 | 4.492076  |
| H | 2.951711  | -0.860268 | 4.995093  |
| C | 0.909151  | -0.163084 | 5.238770  |
| H | 0.909608  | -0.288815 | 6.326648  |
| C | -0.237244 | 0.314192  | 4.586432  |
| H | -1.135279 | 0.562354  | 5.161240  |
| C | -0.237966 | 0.473649  | 3.192560  |
| H | -1.134752 | 0.840333  | 2.688079  |
| O | 4.343745  | -0.975094 | 0.780059  |
| P | 0.869495  | 0.329564  | 0.597777  |
| C | -2.820668 | 0.156262  | -1.849280 |
| C | -2.732522 | 0.265314  | -3.253154 |
| C | -4.054989 | -0.256073 | -1.298815 |
| C | -3.838157 | -0.012960 | -4.077568 |
| H | -1.784805 | 0.560213  | -3.720164 |
| C | -5.162808 | -0.540839 | -2.120363 |
| H | -4.154941 | -0.381608 | -0.213713 |
| C | -5.059001 | -0.417824 | -3.514788 |
| H | -3.740668 | 0.082382  | -5.165744 |
| H | -6.106359 | -0.866395 | -1.665855 |
| H | -5.918616 | -0.640272 | -4.156233 |
| C | -2.099230 | 2.747165  | -1.072887 |
| H | -1.793130 | 2.758979  | -2.125009 |
| C | -1.110619 | 2.829229  | -0.096392 |
| H | -0.064954 | 2.999322  | -0.371092 |

|   |           |          |           |
|---|-----------|----------|-----------|
| C | -3.562042 | 3.040485 | -0.792281 |
| C | -1.464190 | 3.149008 | 1.314185  |
| C | -2.950285 | 3.069905 | 1.659093  |
| C | -3.806490 | 3.749176 | 0.562527  |
| H | -3.944817 | 3.666679 | -1.620675 |
| H | -4.147540 | 2.104820 | -0.842686 |
| O | -0.608441 | 3.495814 | 2.133919  |
| H | -3.237091 | 2.000516 | 1.731206  |
| H | -3.101996 | 3.530255 | 2.649976  |
| H | -4.872094 | 3.613457 | 0.828026  |
| C | -3.529797 | 5.262886 | 0.490837  |
| H | -4.188123 | 5.746410 | -0.252215 |
| H | -3.708644 | 5.745865 | 1.467674  |
| H | -2.484705 | 5.475765 | 0.202434  |

### TS3

|    |           |           |           |
|----|-----------|-----------|-----------|
| Fe | -1.091367 | -3.072270 | 0.499876  |
| Pd | -1.158708 | 0.483900  | -0.555352 |
| C  | -0.787204 | -1.512420 | -0.851840 |
| C  | 0.468402  | -2.112236 | -0.420341 |
| C  | 0.461166  | -3.518828 | -0.746033 |
| H  | 1.251485  | -4.242234 | -0.530074 |
| C  | -0.796686 | -3.806018 | -1.383232 |
| H  | -1.129186 | -4.788772 | -1.725693 |
| C  | -1.558941 | -2.584952 | -1.435771 |
| H  | -2.570606 | -2.499267 | -1.830878 |
| C  | -0.864656 | -2.898449 | 2.536995  |
| H  | -0.049185 | -2.383919 | 3.046698  |
| C  | -0.883302 | -4.283159 | 2.147498  |
| H  | -0.080060 | -5.005236 | 2.303621  |
| C  | -2.132938 | -4.542340 | 1.482087  |
| H  | -2.439815 | -5.492476 | 1.041682  |
| C  | -2.886973 | -3.316571 | 1.459523  |
| H  | -3.864703 | -3.175445 | 0.997124  |
| C  | -2.106071 | -2.302988 | 2.117271  |
| H  | -2.383206 | -1.255790 | 2.238168  |
| C  | 1.618327  | -1.310056 | 0.136424  |
| H  | 1.999897  | -1.731268 | 1.082157  |
| C  | 2.793100  | -1.258562 | -0.861986 |
| H  | 2.585552  | -0.600569 | -1.724413 |
| H  | 2.910633  | -2.268024 | -1.306351 |
| C  | 4.136946  | -0.890042 | -0.239607 |
| O  | 5.063118  | -0.772020 | -2.515160 |
| C  | 5.267639  | -0.672125 | -1.148669 |
| C  | 6.598019  | -0.380496 | -0.901426 |
| H  | 7.035802  | -0.248143 | 0.086049  |
| C  | 7.242464  | -0.294706 | -2.169884 |
| H  | 8.291242  | -0.079007 | -2.368525 |
| C  | 6.265858  | -0.540400 | -3.111004 |
| H  | 6.266399  | -0.584077 | -4.198184 |
| C  | 2.052408  | 1.685375  | 0.027204  |

|   |           |           |           |
|---|-----------|-----------|-----------|
| C | 2.915756  | 2.354784  | 0.915332  |
| H | 2.900163  | 2.113393  | 1.981084  |
| C | 3.788589  | 3.344821  | 0.440277  |
| H | 4.447606  | 3.864131  | 1.143833  |
| C | 3.813247  | 3.675786  | -0.922515 |
| H | 4.493629  | 4.452243  | -1.287750 |
| C | 2.951800  | 3.017797  | -1.814619 |
| H | 2.954601  | 3.278466  | -2.878403 |
| C | 2.070230  | 2.036231  | -1.341161 |
| H | 1.370157  | 1.548841  | -2.030954 |
| C | 0.835025  | 0.417865  | 2.398727  |
| C | 1.951667  | -0.013704 | 3.150856  |
| H | 2.855900  | -0.360469 | 2.637957  |
| C | 1.900385  | 0.003111  | 4.553450  |
| H | 2.769663  | -0.333250 | 5.128538  |
| C | 0.744092  | 0.444063  | 5.216765  |
| H | 0.708008  | 0.451290  | 6.311254  |
| C | -0.367002 | 0.870673  | 4.473671  |
| H | -1.273215 | 1.211525  | 4.984969  |
| C | -0.321406 | 0.856853  | 3.072101  |
| H | -1.188309 | 1.177252  | 2.487845  |
| O | 4.320988  | -0.813604 | 0.984367  |
| P | 0.851695  | 0.386082  | 0.556866  |
| C | -2.924555 | 0.364120  | -1.860219 |
| C | -2.593190 | 0.326496  | -3.238798 |
| C | -4.067024 | -0.354519 | -1.442187 |
| C | -3.347164 | -0.422256 | -4.150448 |
| H | -1.726927 | 0.894876  | -3.599573 |
| C | -4.838546 | -1.091874 | -2.357111 |
| H | -4.359197 | -0.358034 | -0.386951 |
| C | -4.481392 | -1.131162 | -3.713496 |
| H | -3.057837 | -0.445749 | -5.207063 |
| H | -5.719442 | -1.640207 | -2.004307 |
| H | -5.084710 | -1.701648 | -4.427413 |
| C | -2.765573 | 2.242099  | -1.106406 |
| H | -2.878074 | 2.588304  | -2.139607 |
| C | -1.506873 | 2.645131  | -0.494403 |
| H | -0.701702 | 2.974354  | -1.167636 |
| C | -4.033848 | 2.387440  | -0.260587 |
| C | -1.458525 | 3.354725  | 0.803911  |
| C | -2.780633 | 3.530533  | 1.569606  |
| C | -3.996615 | 3.653222  | 0.627291  |
| H | -4.920813 | 2.380563  | -0.918089 |
| H | -4.137680 | 1.523737  | 0.418674  |
| O | -0.417065 | 3.872692  | 1.230568  |
| H | -2.927723 | 2.655050  | 2.234830  |
| H | -2.663319 | 4.412410  | 2.222606  |
| H | -4.917691 | 3.642637  | 1.242579  |
| C | -3.984912 | 4.965473  | -0.176510 |
| H | -4.857719 | 5.025188  | -0.850943 |
| H | -4.018816 | 5.838094  | 0.498964  |



H -3.072994 5.060649 -0.792030

Intermediate 4

Fe -1.081616 -3.007373 0.559319  
Pd -1.170837 0.485249 -0.726978  
C -0.779089 -1.523747 -0.871473  
C 0.482102 -2.077369 -0.388012  
C 0.497944 -3.499281 -0.636375  
H 1.298021 -4.192550 -0.364958  
C -0.743023 -3.844177 -1.272776  
H -1.056206 -4.849105 -1.564274  
C -1.524197 -2.643802 -1.405242  
H -2.528703 -2.600116 -1.821638  
C -0.887677 -2.764873 2.594512  
H -0.083116 -2.231428 3.101266  
C -0.894369 -4.160971 2.249304  
H -0.089016 -4.872761 2.438233  
C -2.132640 -4.447723 1.573771  
H -2.428391 -5.412859 1.159312  
C -2.891914 -3.227657 1.499780  
H -3.861623 -3.105438 1.015742  
C -2.124603 -2.190000 2.135081  
H -2.409735 -1.141495 2.218087  
C 1.633458 -1.259605 0.137466  
H 2.017853 -1.664619 1.088997  
C 2.804428 -1.248021 -0.866783  
H 2.602330 -0.614043 -1.747593  
H 2.907826 -2.271021 -1.282903  
C 4.155641 -0.881320 -0.258163  
O 5.077772 -0.849135 -2.538327  
C 5.287335 -0.710036 -1.175998  
C 6.622984 -0.433502 -0.940425  
H 7.065211 -0.277950 0.041684  
C 7.265804 -0.398517 -2.212166  
H 8.317705 -0.207368 -2.419236  
C 6.283084 -0.657008 -3.143423  
H 6.280463 -0.735371 -4.228651  
C 2.131219 1.712464 0.049345  
C 2.898743 2.446699 0.974597  
H 2.793037 2.256334 2.045360  
C 3.793955 3.431107 0.530476  
H 4.379637 3.995393 1.263675  
C 3.935365 3.698944 -0.839303  
H 4.633834 4.470264 -1.180295  
C 3.165098 2.984418 -1.770011  
H 3.255829 3.195428 -2.840830  
C 2.261703 2.006783 -1.328086  
H 1.633501 1.478311 -2.056150  
C 0.845268 0.447929 2.379638  
C 1.972287 0.048819 3.135037

|   |           |           |           |
|---|-----------|-----------|-----------|
| H | 2.894252  | -0.250071 | 2.623642  |
| C | 1.907543  | 0.028586  | 4.536811  |
| H | 2.785890  | -0.282040 | 5.112647  |
| C | 0.725642  | 0.399217  | 5.198566  |
| H | 0.678568  | 0.377618  | 6.292438  |
| C | -0.396864 | 0.790691  | 4.453913  |
| H | -1.323897 | 1.074347  | 4.962588  |
| C | -0.335956 | 0.815529  | 3.052728  |
| H | -1.215341 | 1.108390  | 2.473577  |
| O | 4.343959  | -0.771948 | 0.962339  |
| P | 0.878538  | 0.441553  | 0.534833  |
| C | -2.783463 | -0.030187 | -1.924336 |
| C | -2.695136 | -0.033498 | -3.332461 |
| C | -4.003613 | -0.437652 | -1.341741 |
| C | -3.788091 | -0.417279 | -4.131143 |
| H | -1.757278 | 0.255843  | -3.822667 |
| C | -5.098846 | -0.826557 | -2.136541 |
| H | -4.100285 | -0.479537 | -0.249851 |
| C | -4.995660 | -0.816144 | -3.536437 |
| H | -3.690812 | -0.408454 | -5.223471 |
| H | -6.032097 | -1.145169 | -1.656583 |
| H | -5.845544 | -1.120040 | -4.157125 |
| C | -2.160614 | 2.604674  | -1.348371 |
| H | -1.944413 | 2.514440  | -2.418000 |
| C | -1.100352 | 2.832833  | -0.475215 |
| H | -0.084359 | 2.982860  | -0.854366 |
| C | -3.603876 | 2.888360  | -0.968282 |
| C | -1.341806 | 3.321982  | 0.911710  |
| C | -2.797836 | 3.321606  | 1.376617  |
| C | -3.732382 | 3.822136  | 0.253821  |
| H | -4.111304 | 3.333593  | -1.844270 |
| H | -4.143780 | 1.943323  | -0.770378 |
| O | -0.423836 | 3.752939  | 1.615254  |
| H | -3.090160 | 2.284423  | 1.646093  |
| H | -2.868491 | 3.938833  | 2.288291  |
| H | -3.379521 | 4.830807  | -0.045549 |
| C | -5.188176 | 3.942425  | 0.725599  |
| H | -5.276295 | 4.646705  | 1.571508  |
| H | -5.842372 | 4.305910  | -0.086871 |
| H | -5.578427 | 2.963072  | 1.058535  |

#### TS4

|    |           |           |           |
|----|-----------|-----------|-----------|
| Fe | -1.086198 | -2.967710 | 0.792980  |
| Pd | -1.107801 | 0.434236  | -0.701448 |
| C  | -0.729132 | -1.584696 | -0.731470 |
| C  | 0.506901  | -2.122531 | -0.179949 |
| C  | 0.509753  | -3.559013 | -0.329867 |
| H  | 1.288102  | -4.247619 | 0.008218  |
| C  | -0.724579 | -3.926904 | -0.971567 |
| H  | -1.046599 | -4.945853 | -1.198693 |
| C  | -1.481666 | -2.723429 | -1.204302 |

H -2.476793 -2.687252 -1.646865  
C -0.969258 -2.491427 2.792049  
H -0.209576 -1.859873 3.253246  
C -0.891803 -3.915583 2.606891  
H -0.057021 -4.555887 2.897082  
C -2.090947 -4.343948 1.936164  
H -2.321985 -5.364111 1.624898  
C -2.910452 -3.183165 1.706055  
H -3.872722 -3.170669 1.192514  
C -2.219415 -2.039654 2.239586  
H -2.559262 -1.004917 2.194653  
C 1.635120 -1.254989 0.320632  
H 1.977190 -1.556442 1.325631  
C 2.848107 -1.321953 -0.629358  
H 2.671286 -0.780548 -1.575320  
H 2.986065 -2.378843 -0.936466  
C 4.164014 -0.865471 -0.006324  
O 5.185414 -1.032451 -2.237676  
C 5.331288 -0.756203 -0.888028  
C 6.648831 -0.423250 -0.624956  
H 7.043204 -0.161030 0.354807  
C 7.346403 -0.495126 -1.865819  
H 8.401897 -0.297137 -2.046510  
C 6.411659 -0.868361 -2.807527  
H 6.458751 -1.051167 -3.879080  
C 2.074826 1.710137 -0.129036  
C 2.884952 2.500624 0.708463  
H 2.814429 2.399018 1.794345  
C 3.775183 3.432832 0.155277  
H 4.391505 4.047883 0.819239  
C 3.871409 3.584463 -1.235762  
H 4.565529 4.315903 -1.662823  
C 3.063175 2.804983 -2.078489  
H 3.121583 2.925521 -3.165536  
C 2.163510 1.881683 -1.528550  
H 1.503801 1.301520 -2.185454  
C 0.749801 0.727548 2.321269  
C 1.837842 0.419643 3.170078  
H 2.772793 0.036433 2.745824  
C 1.717031 0.599916 4.556921  
H 2.564455 0.358730 5.207446  
C 0.519041 1.080615 5.109419  
H 0.429008 1.215053 6.192502  
C -0.565062 1.380921 4.270805  
H -1.504506 1.748998 4.696054  
C -0.449558 1.204806 2.884362  
H -1.295997 1.423391 2.227113  
O 4.295080 -0.630964 1.204161  
P 0.852871 0.476824 0.499563  
C -2.796143 0.158453 -2.079490  
C -2.374484 0.000588 -3.424914

|   |           |           |           |
|---|-----------|-----------|-----------|
| C | -3.963980 | -0.525578 | -1.674070 |
| C | -3.066264 | -0.832637 | -4.312077 |
| H | -1.488793 | 0.542434  | -3.779234 |
| C | -4.673267 | -1.346737 | -2.567933 |
| H | -4.324939 | -0.433264 | -0.644745 |
| C | -4.226515 | -1.506637 | -3.888295 |
| H | -2.707971 | -0.949742 | -5.341000 |
| H | -5.576267 | -1.865465 | -2.226353 |
| H | -4.780520 | -2.143532 | -4.585841 |
| C | -2.711188 | 2.094048  | -1.482370 |
| H | -2.842447 | 2.343778  | -2.541395 |
| C | -1.463666 | 2.585373  | -0.914744 |
| H | -0.656579 | 2.849023  | -1.613485 |
| C | -3.978260 | 2.280084  | -0.646985 |
| C | -1.433572 | 3.422643  | 0.305386  |
| C | -2.767020 | 3.672025  | 1.030267  |
| C | -3.976312 | 3.641808  | 0.077895  |
| H | -4.869147 | 2.164294  | -1.288773 |
| H | -4.044746 | 1.497496  | 0.131693  |
| O | -0.401053 | 3.989154  | 0.689815  |
| H | -2.910784 | 2.895175  | 1.810744  |
| H | -2.672269 | 4.636186  | 1.559090  |
| H | -3.842882 | 4.443956  | -0.677296 |
| C | -5.300773 | 3.886158  | 0.816120  |
| H | -5.289190 | 4.856496  | 1.343071  |
| H | -6.156559 | 3.889385  | 0.117548  |
| H | -5.483827 | 3.097661  | 1.569892  |

## References

- [1] Gaussian 09, Revision **B.01**, M. J. Frisch, G. W. Trucks, H. B. Schlegel, G. E. Scuseria, M. A. Robb, J. R. Cheeseman, G. Scalmani, V. Barone, B. Mennucci, G. A. Petersson, H. Nakatsuji, M. Caricato, X. Li, H. P. Hratchian, A. F. Izmaylov, J. Bloino, G. Zheng, J. L. Sonnenberg, M. Hada, M. Ehara, K. Toyota, R. Fukuda, J. Hasegawa, M. Ishida, T. Nakajima, Y. Honda, O. Kitao, H. Nakai, T. Vreven, J. A. Montgomery, Jr., J. E. Peralta, F. Ogliaro, M. Bearpark, J. J. Heyd, E. Brothers, K. N. Kudin, V. N. Staroverov, R. Kobayashi, J. Normand, K. Raghavachari, A. Rendell, J. C. Burant, S. S. Iyengar, J. Tomasi, M. Cossi, N. Rega, N. J. Millam, M. Klene, J. E. Knox, J. B. Cross, V. Bakken, C. Adamo, J. Jaramillo, R. Gomperts, R. E. Stratmann, O. Yazyev, A. J. Austin, R. Cammi, C. Pomelli, J. W. Ochterski, R. L. Martin, K. Morokuma, V. G. Zakrzewski, G. A. Voth, P. Salvador, J. J. Dannenberg, S. Dapprich, A. D. Daniels, Ö. Farkas, J. B. Foresman, J. V. Ortiz, J. Cioslowski, D. J. Fox, Gaussian, Inc., Wallingford CT, 2010.
- [2] (a) A. D. Becke, *Chem. Phys.* **1993**, *98*, 1372–1377 (b) A. D. Becke, *J. Chem. Phys.* **1993**, *98*, 5648–5652 (c) C. H. Holder, L. Zou, A. N. Marziale, P. Liu, Y. Lan, M. Gatti, K. Kikushima, K. N. Houk, B. M. Stoltz, *J. Am. Chem. Soc.* **2013**, *135*, 14996–15007 (d) S. H. Vosko, K. A. Jackson, M. R. Pederson, D. J. Singh, C. Fiolhais, *Phys. Rev. B* **1992**, *46*, 6671–6687 (e) Perdew, J. P., *Phys. Rev. B* **1986**, *33*, 8822–8824.
- [3] (a) W. J. Hehre, R. Ditchfield, J. A. Pople, *J. Chem. Phys.*, **1972**, *56*, 2257 (b) P. C. Hariharan, J. A. Pople, *Theor. Chem. Acc.*, **1973**, *28*, 213 (c) M. J. Frisch, J. A. Pople, J. S. Binkley, *J. Chem. Phys.*, **1984**, *80*, 3265.
- [4] (a) A. Bergner, M. Dolg, W. Kuechle, H. Stoll, H. Preuss, *Mol. Phys.* **1993**, *80*, 1431 (b) M. Kaupp, P. v. R. Schleyer, H. Stoll, H. Preuss, *J. Chem. Phys.* **1991**, *94*, 1360 (c) M. Dolg, M. Stoll, H. Preuss, R. M. Pitzer, *J. Phys. Chem.* **1993**, *97*, 5852.
